# Supplementary material for: Educational trajectories within and beyond the core education phase in Switzerland: a sequence analysis based on SHP data 1999–2023
Source: Front Sociol. 2025 Jun 5;10:1585910. doi: 10.3389/fsoc.2025.1585910 (PMC12177887; doi:10.3389/fsoc.2025.1585910)
Supplement: Supplementary file 1 [file Data_Sheet_1.docx]

| **Appendix**  **Figure A.1: Sequence index plot of educational trajectories across cohort groups** |
| --- |
| 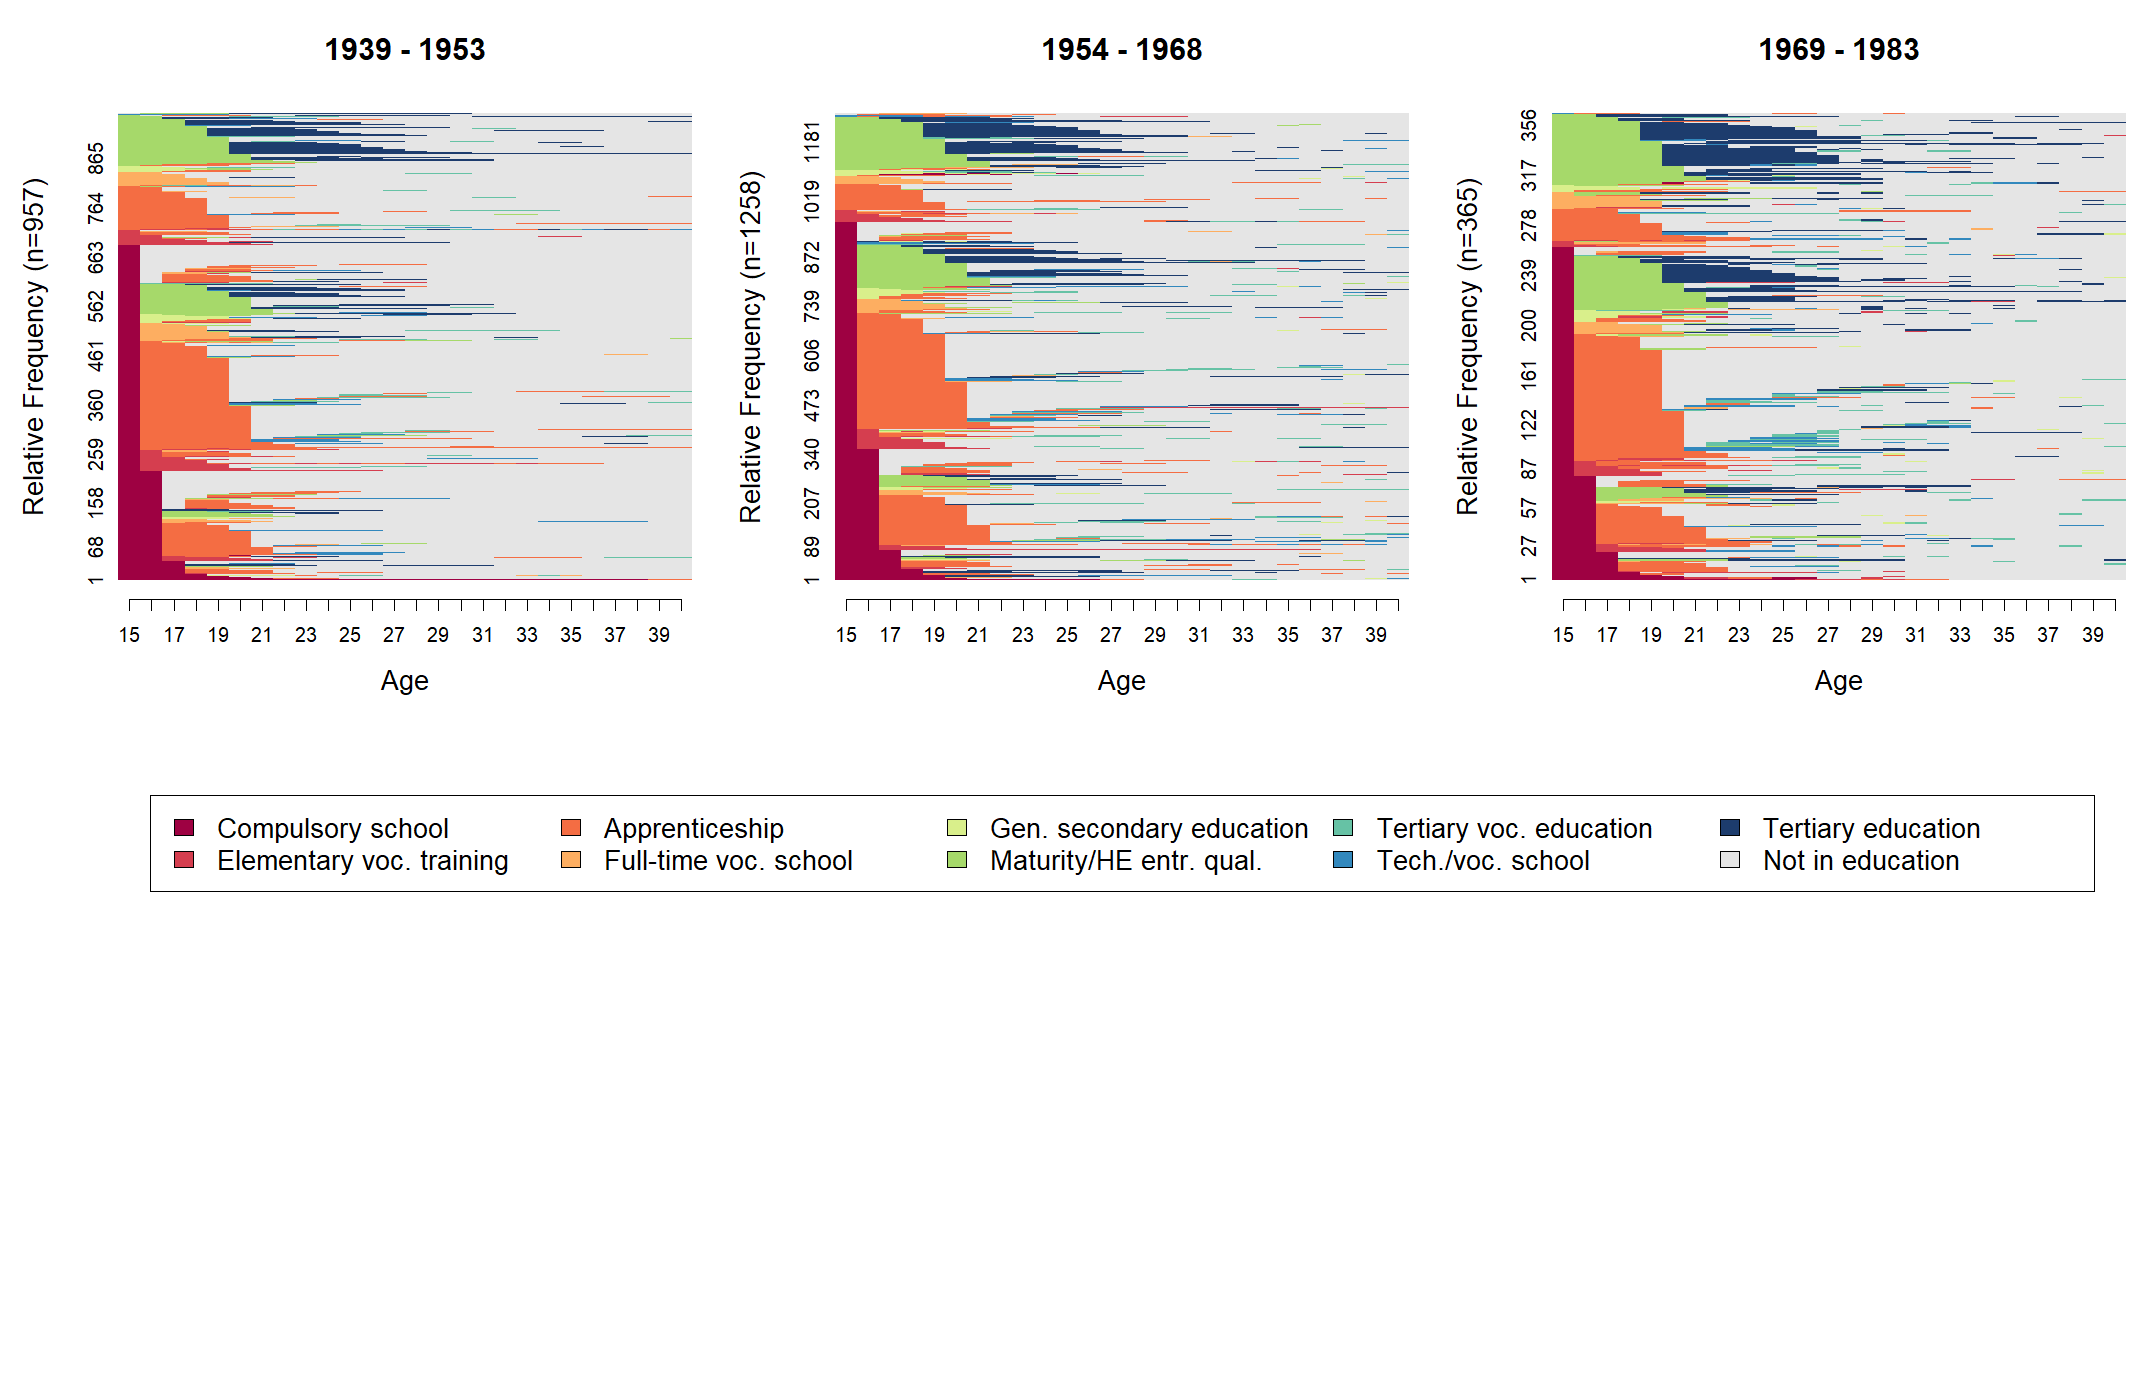 |
| *Source: Swiss Household Panel data, 1999–2023* |

| **Figure A.2: Mean time plot of the different educational states across cohorts** |
| --- |
| 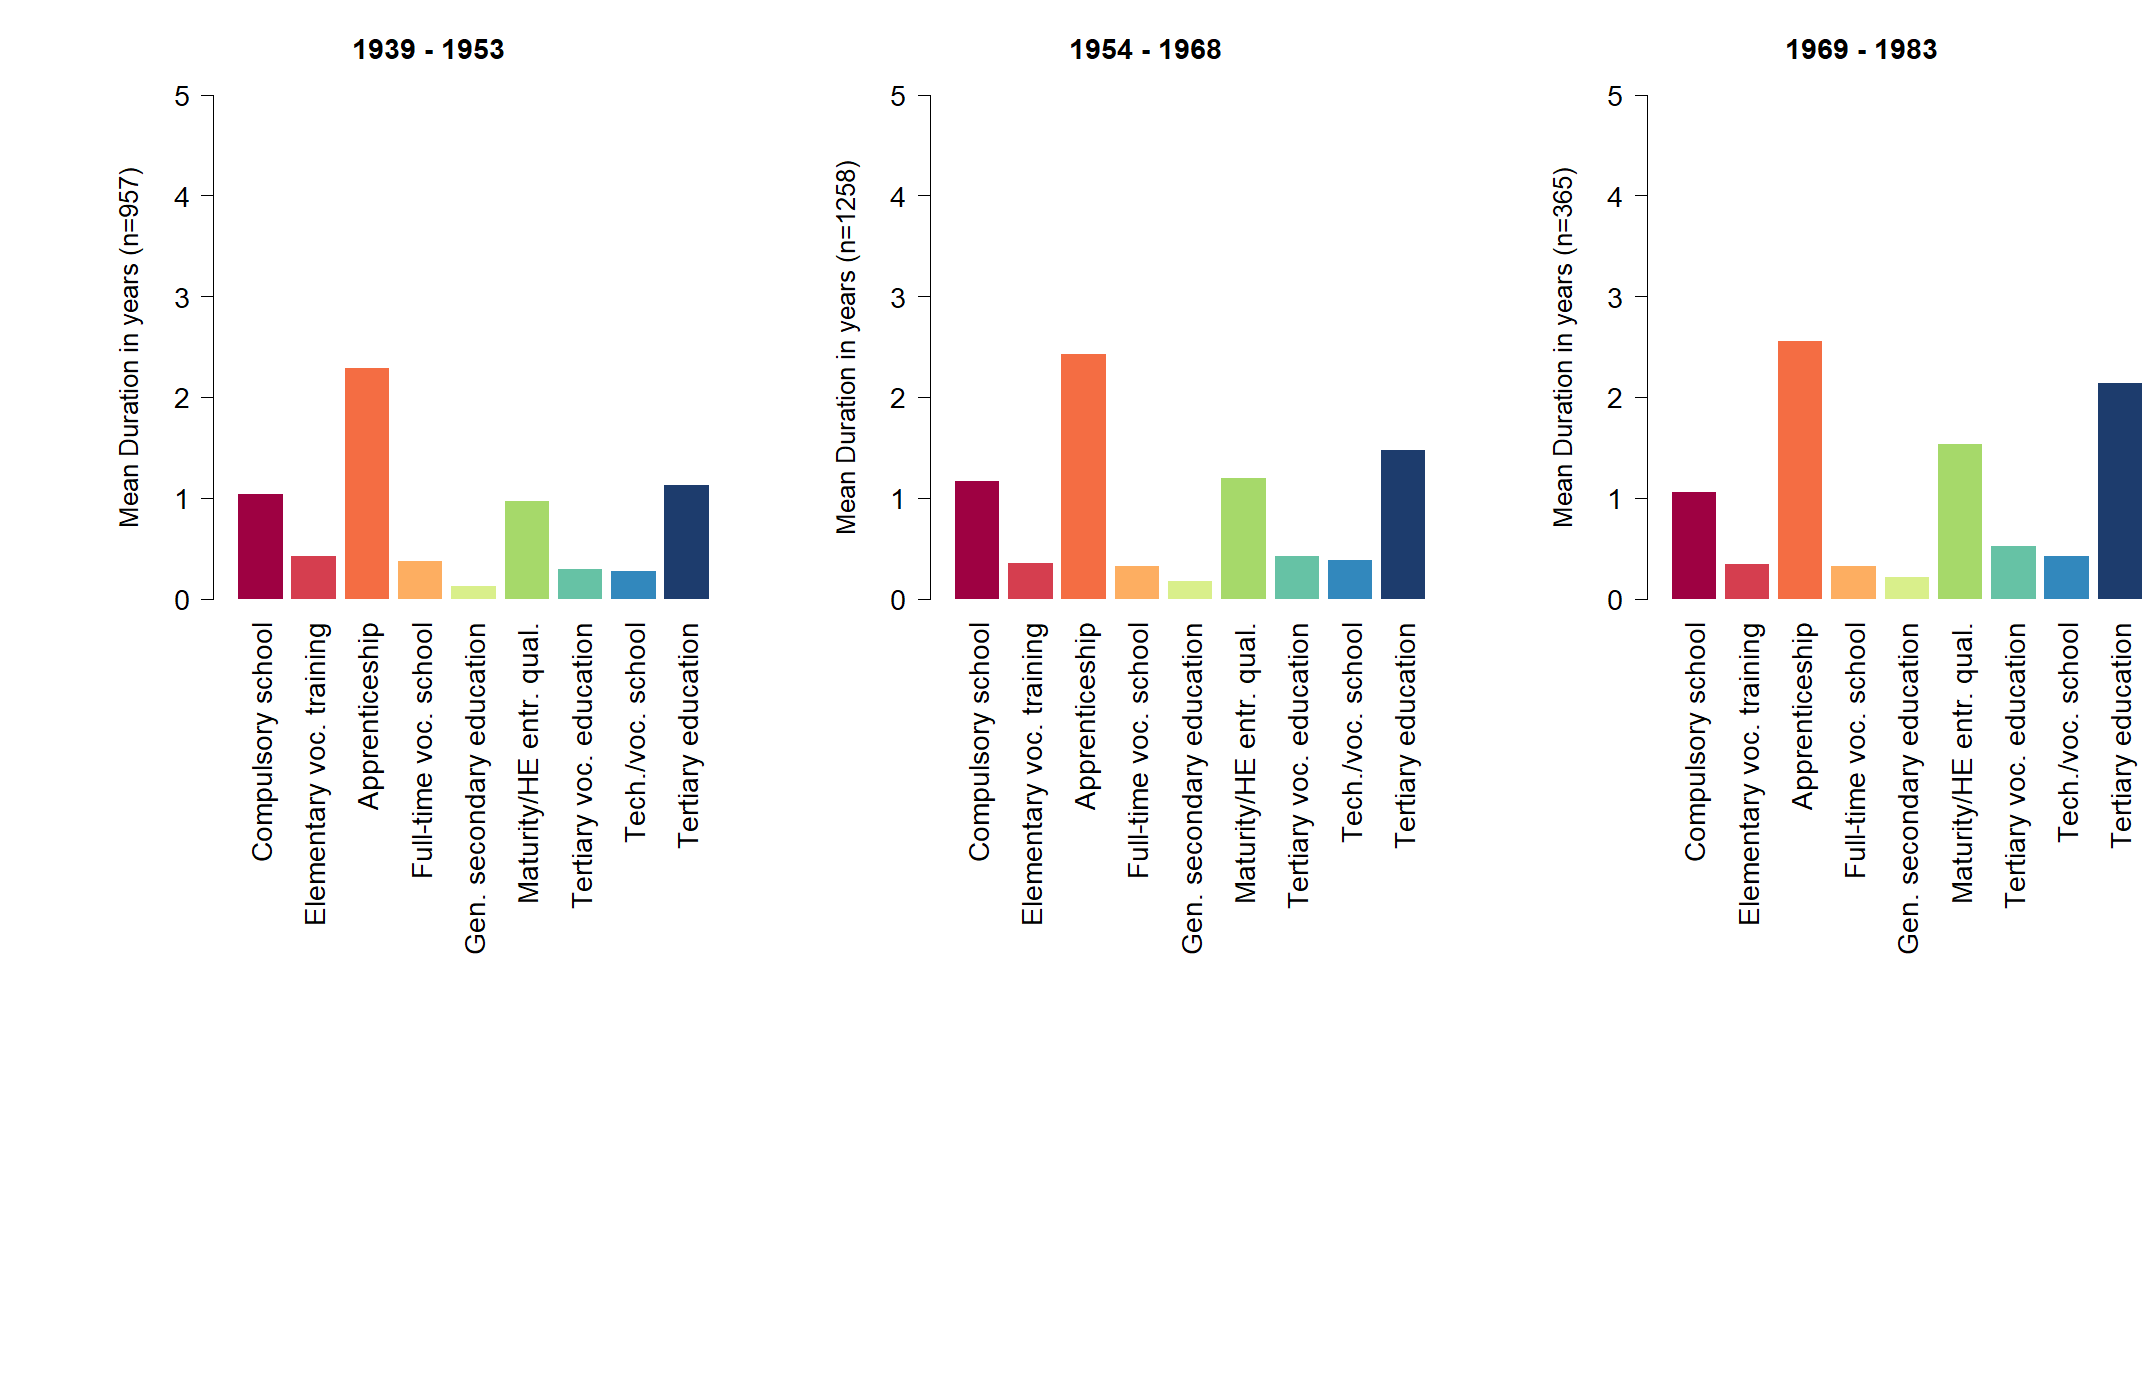  *Source: Swiss Household Panel data, 1999–2023* |

| **Figure A.3: Cluster performance plots** | | |
| --- | --- | --- |
| 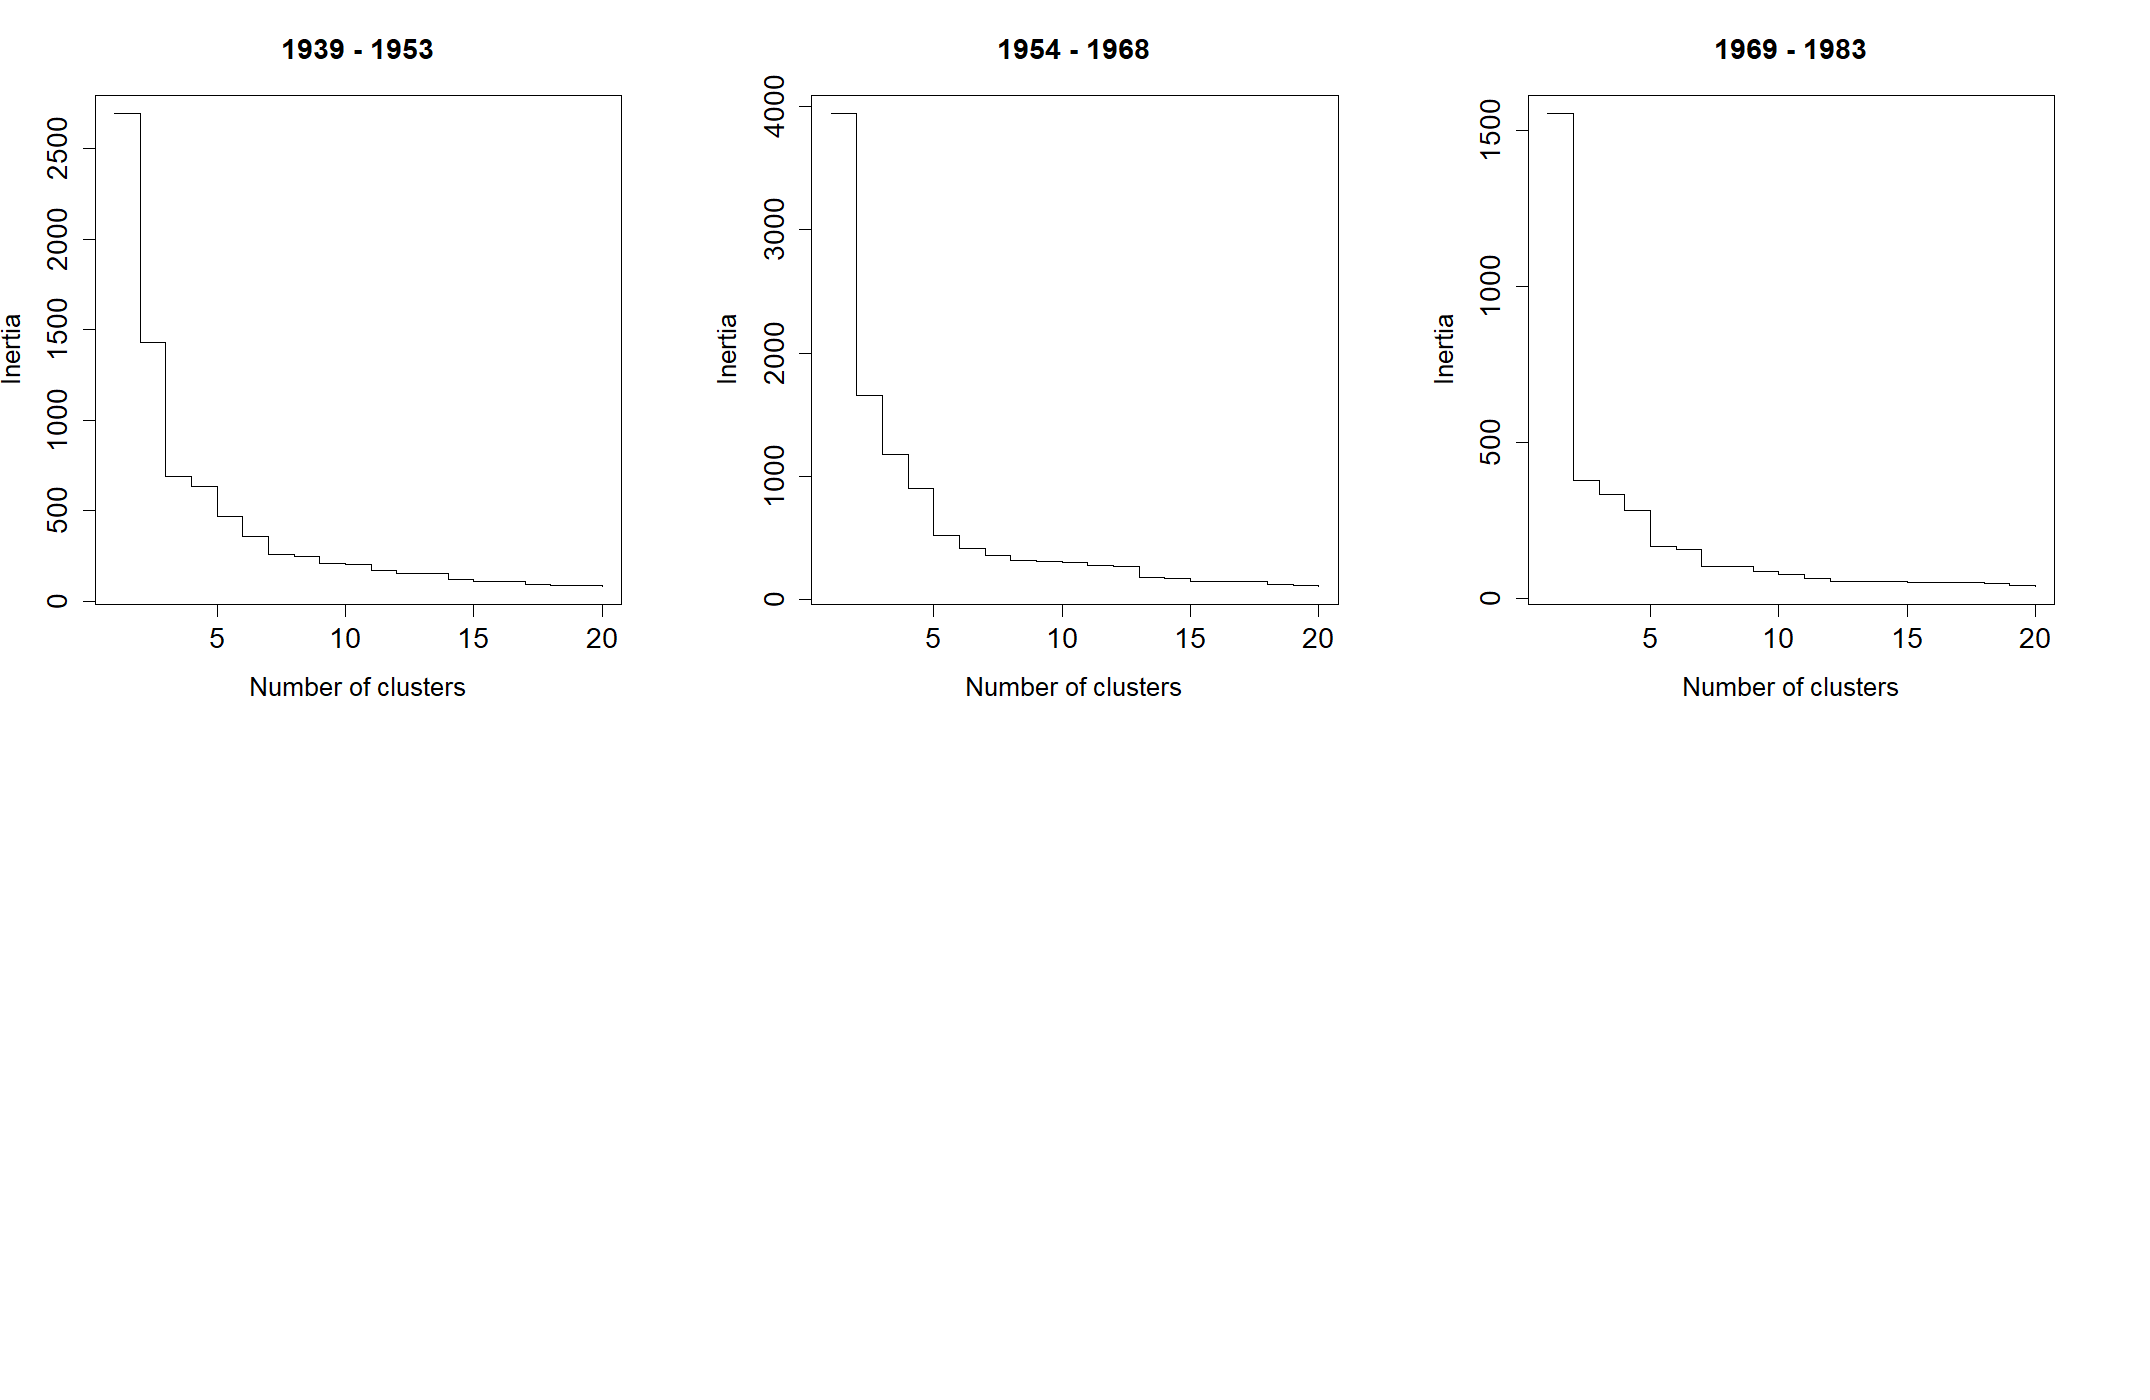 | | |
| 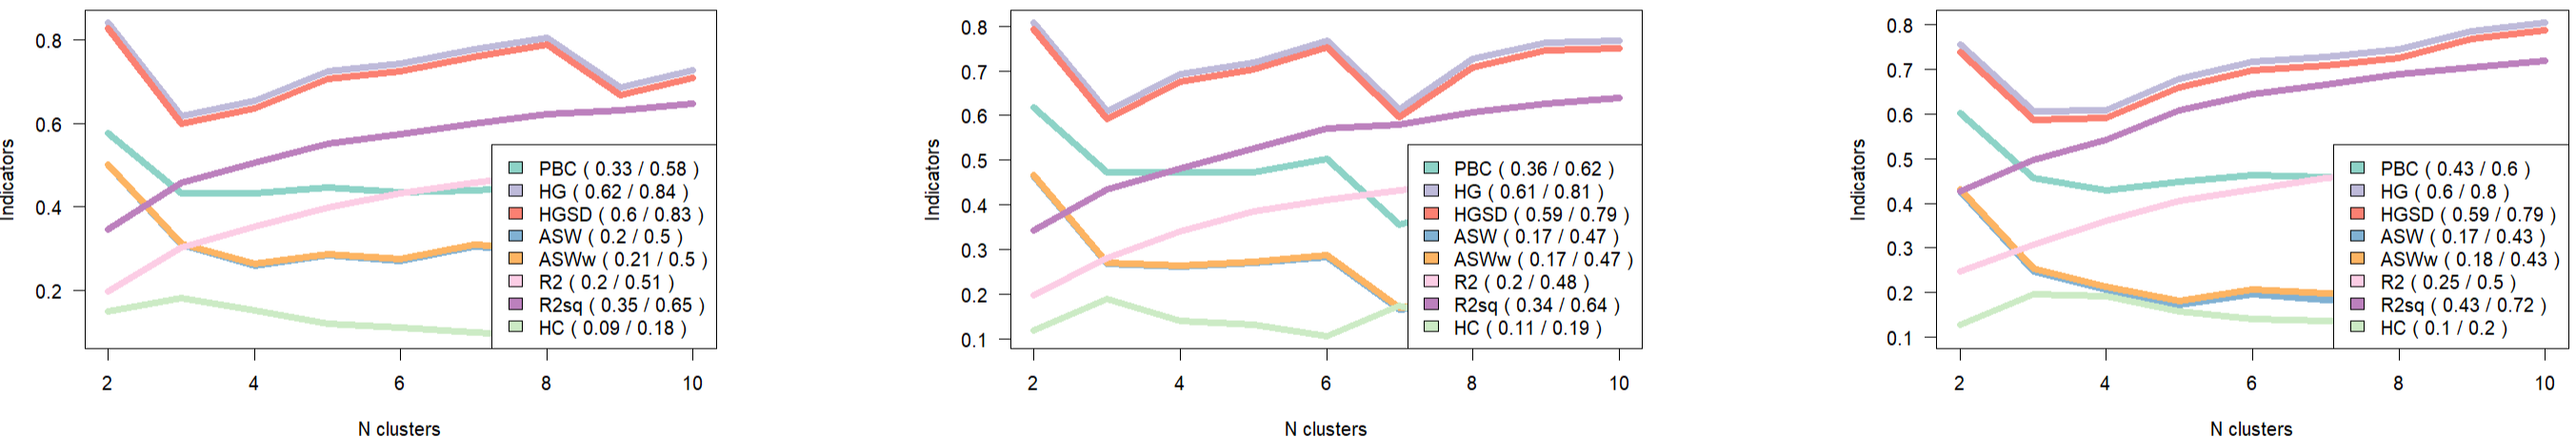 | 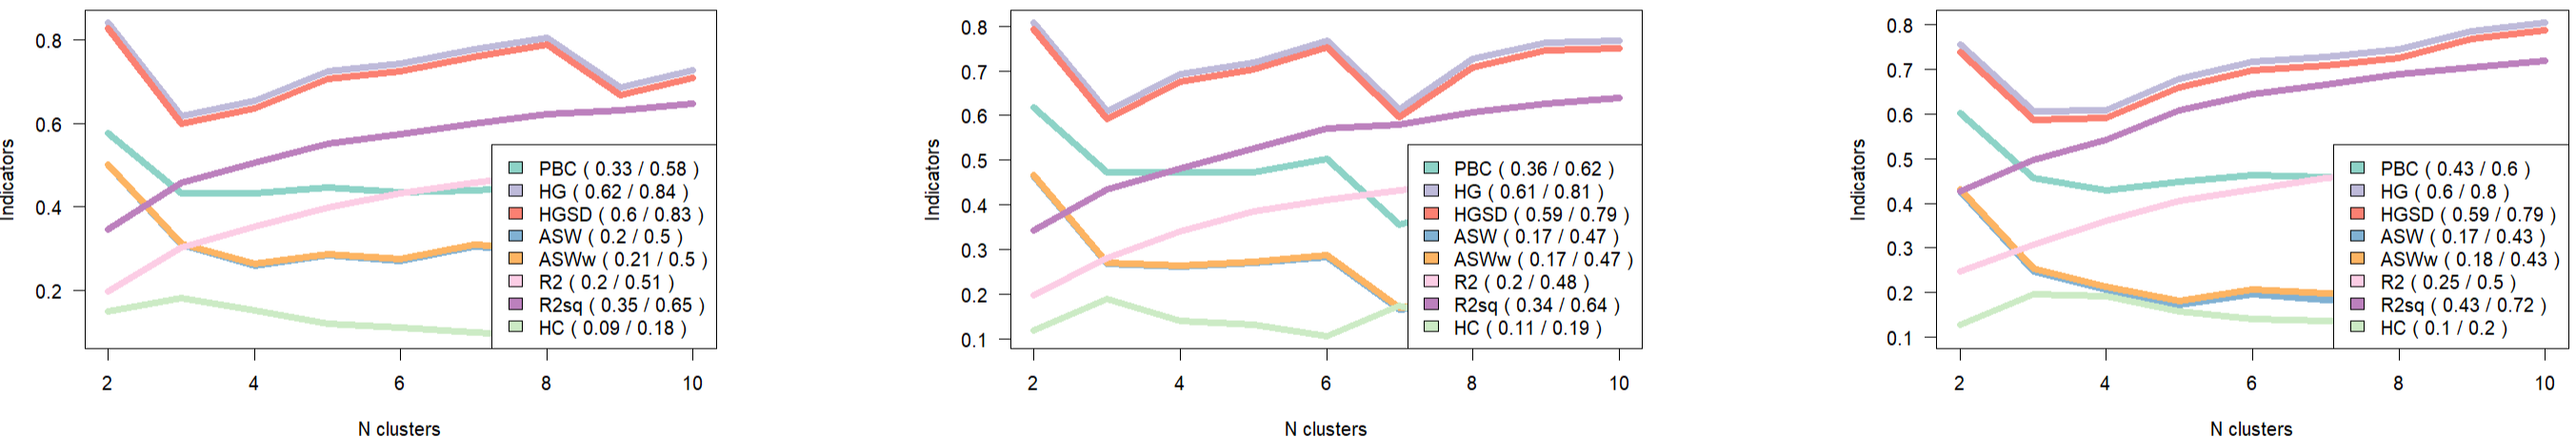 | 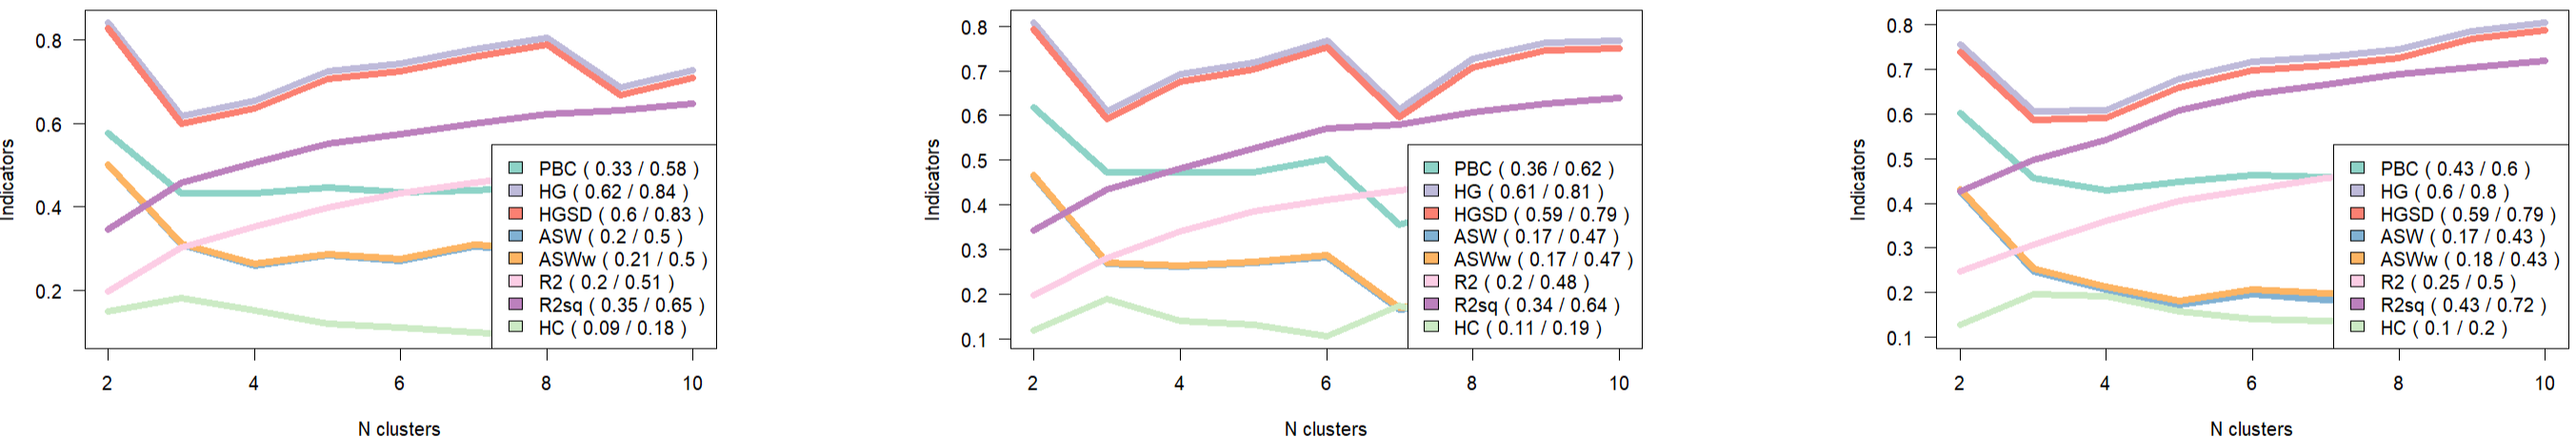 |

| **Figure A.4: Educational trajectory clusters - state distribution plots across cohort groups**  *2-Class Solution* |
| --- |
| 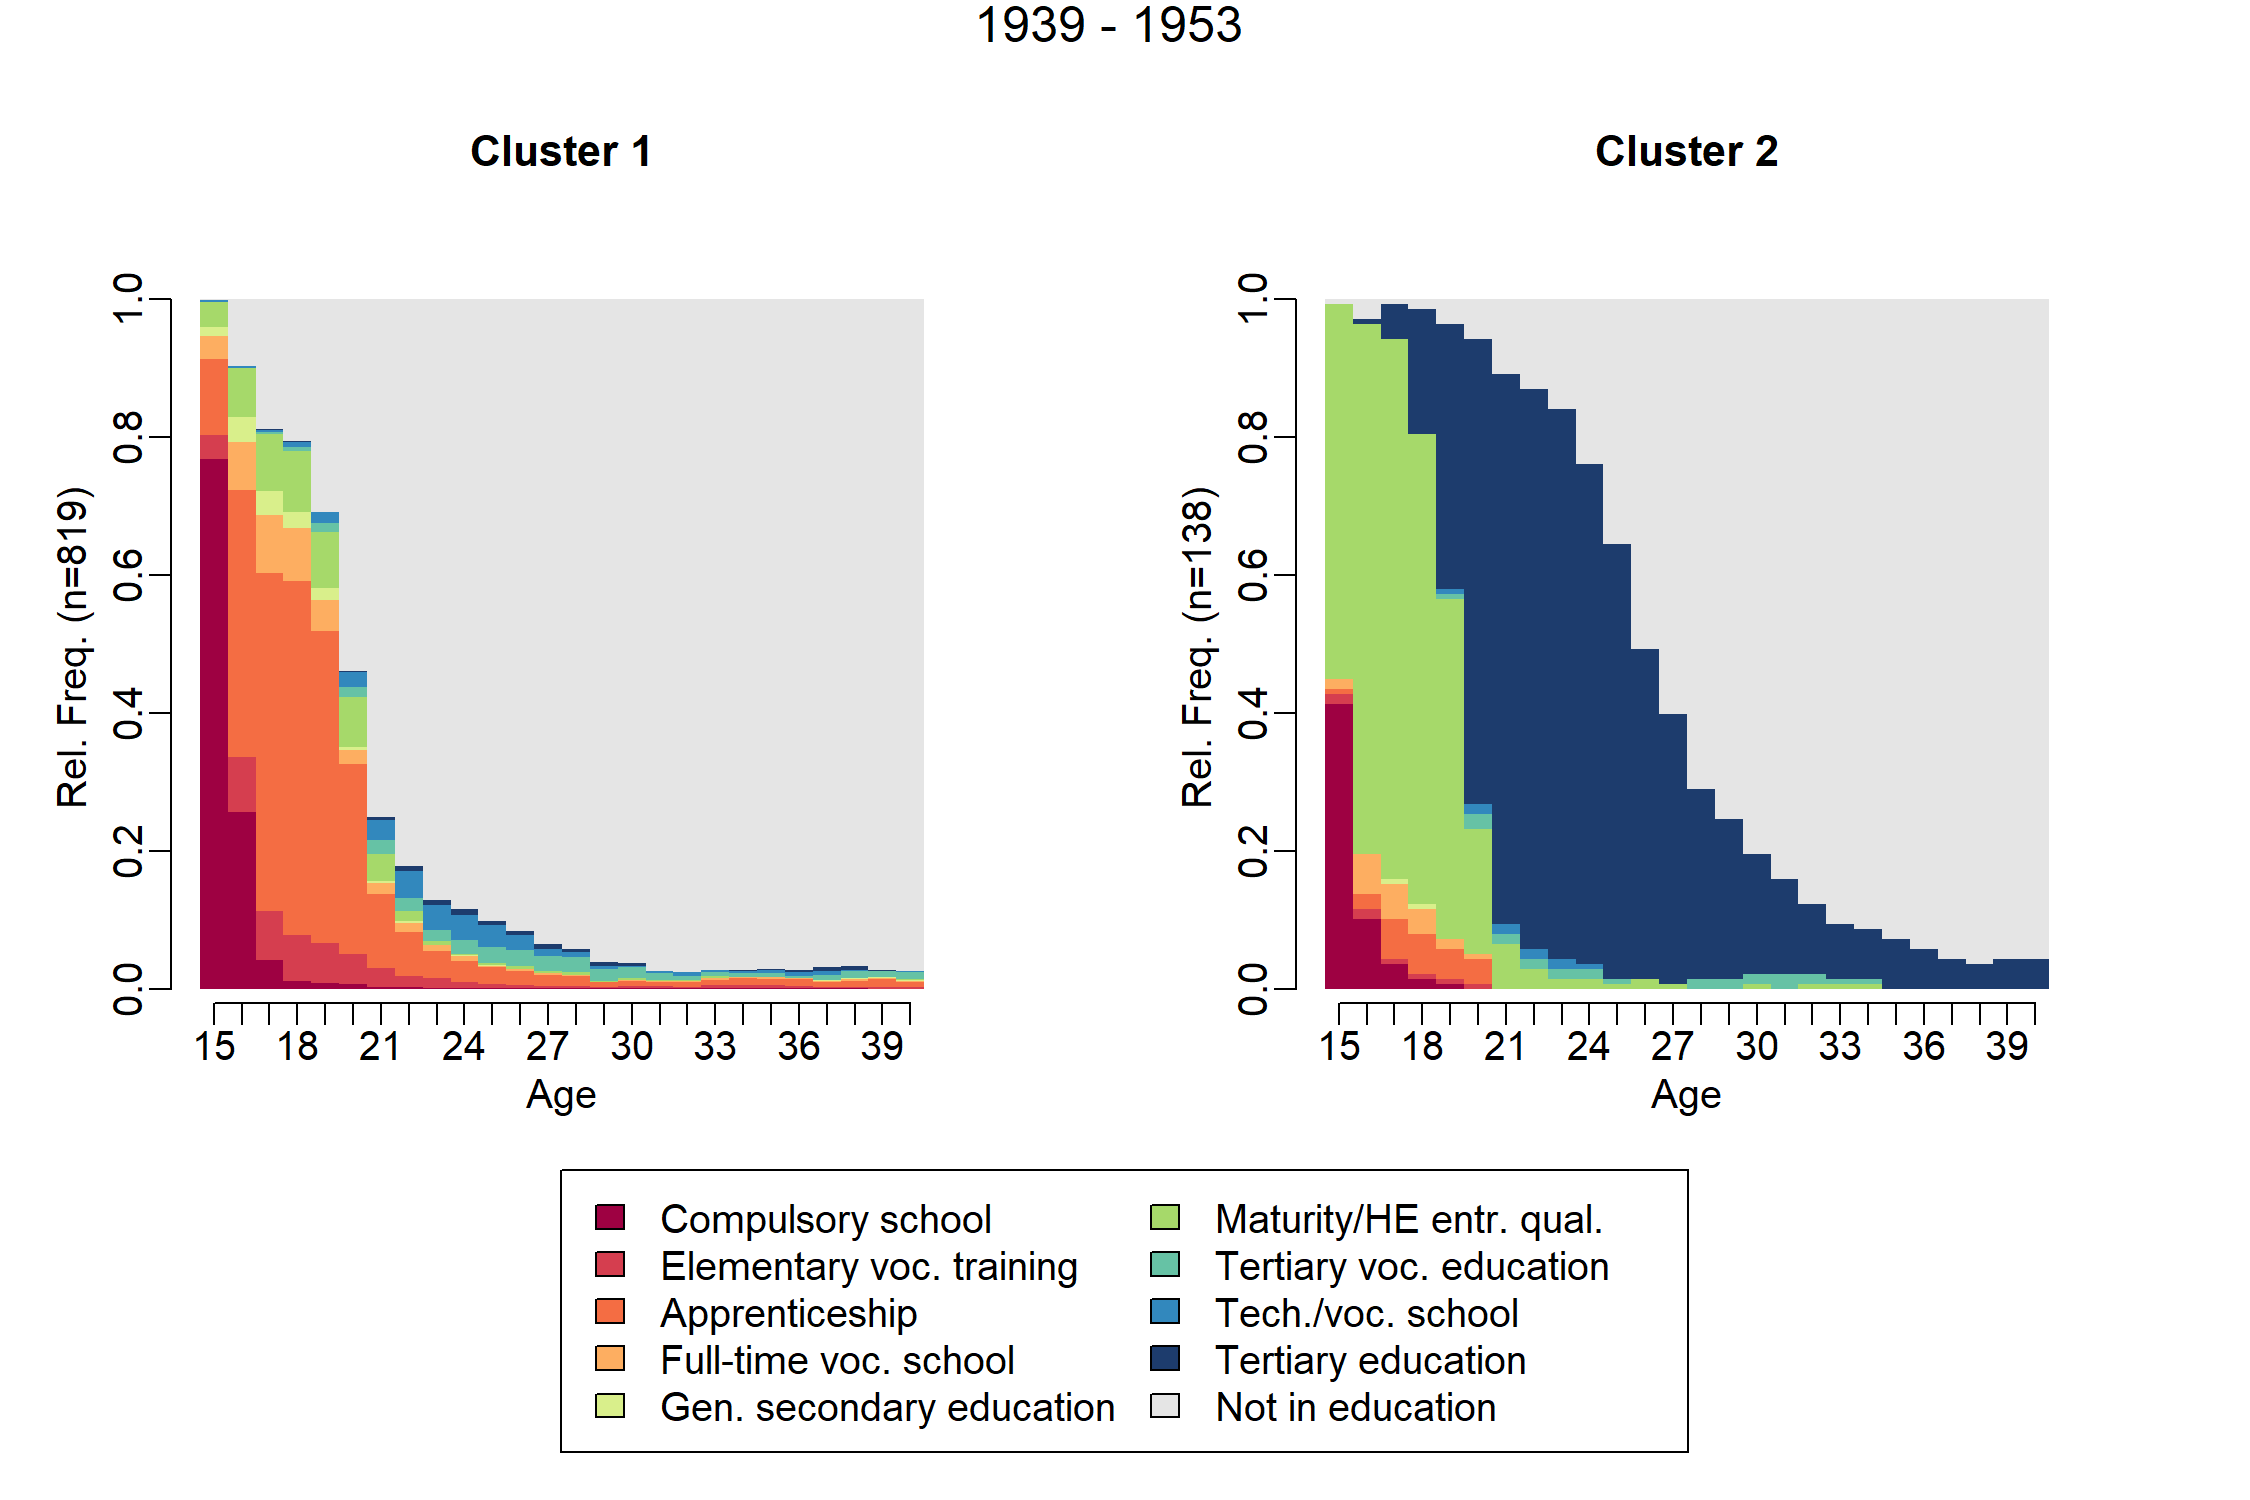 |
|  |
| 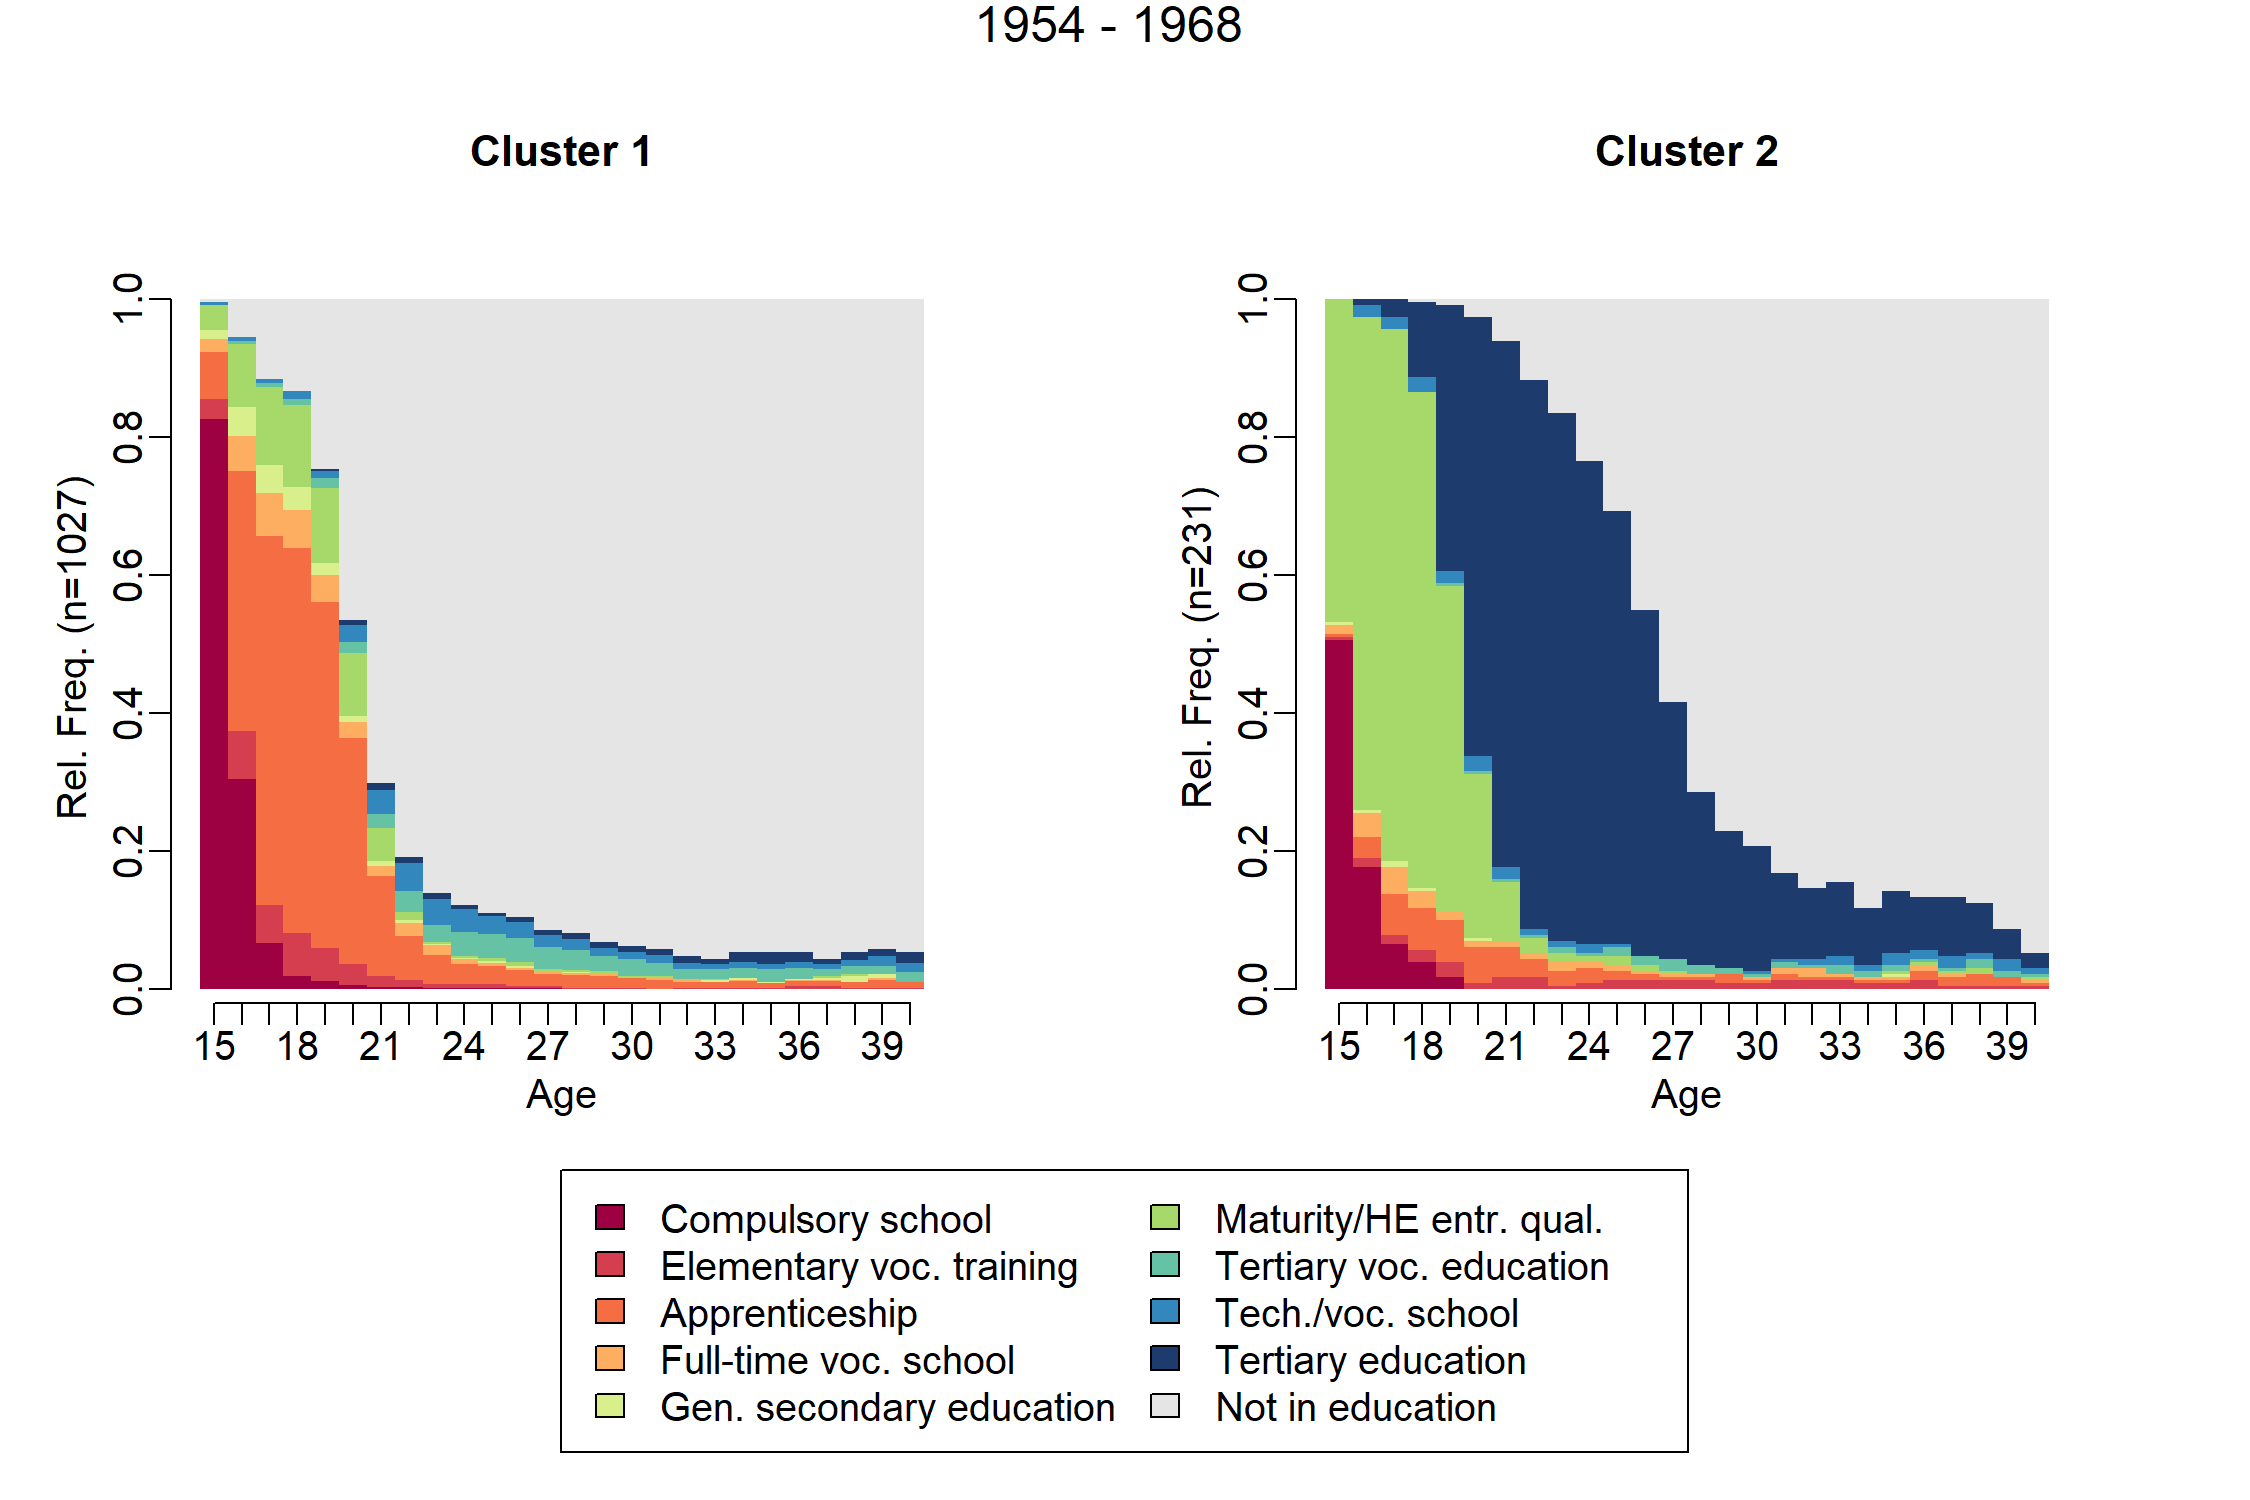 |
| 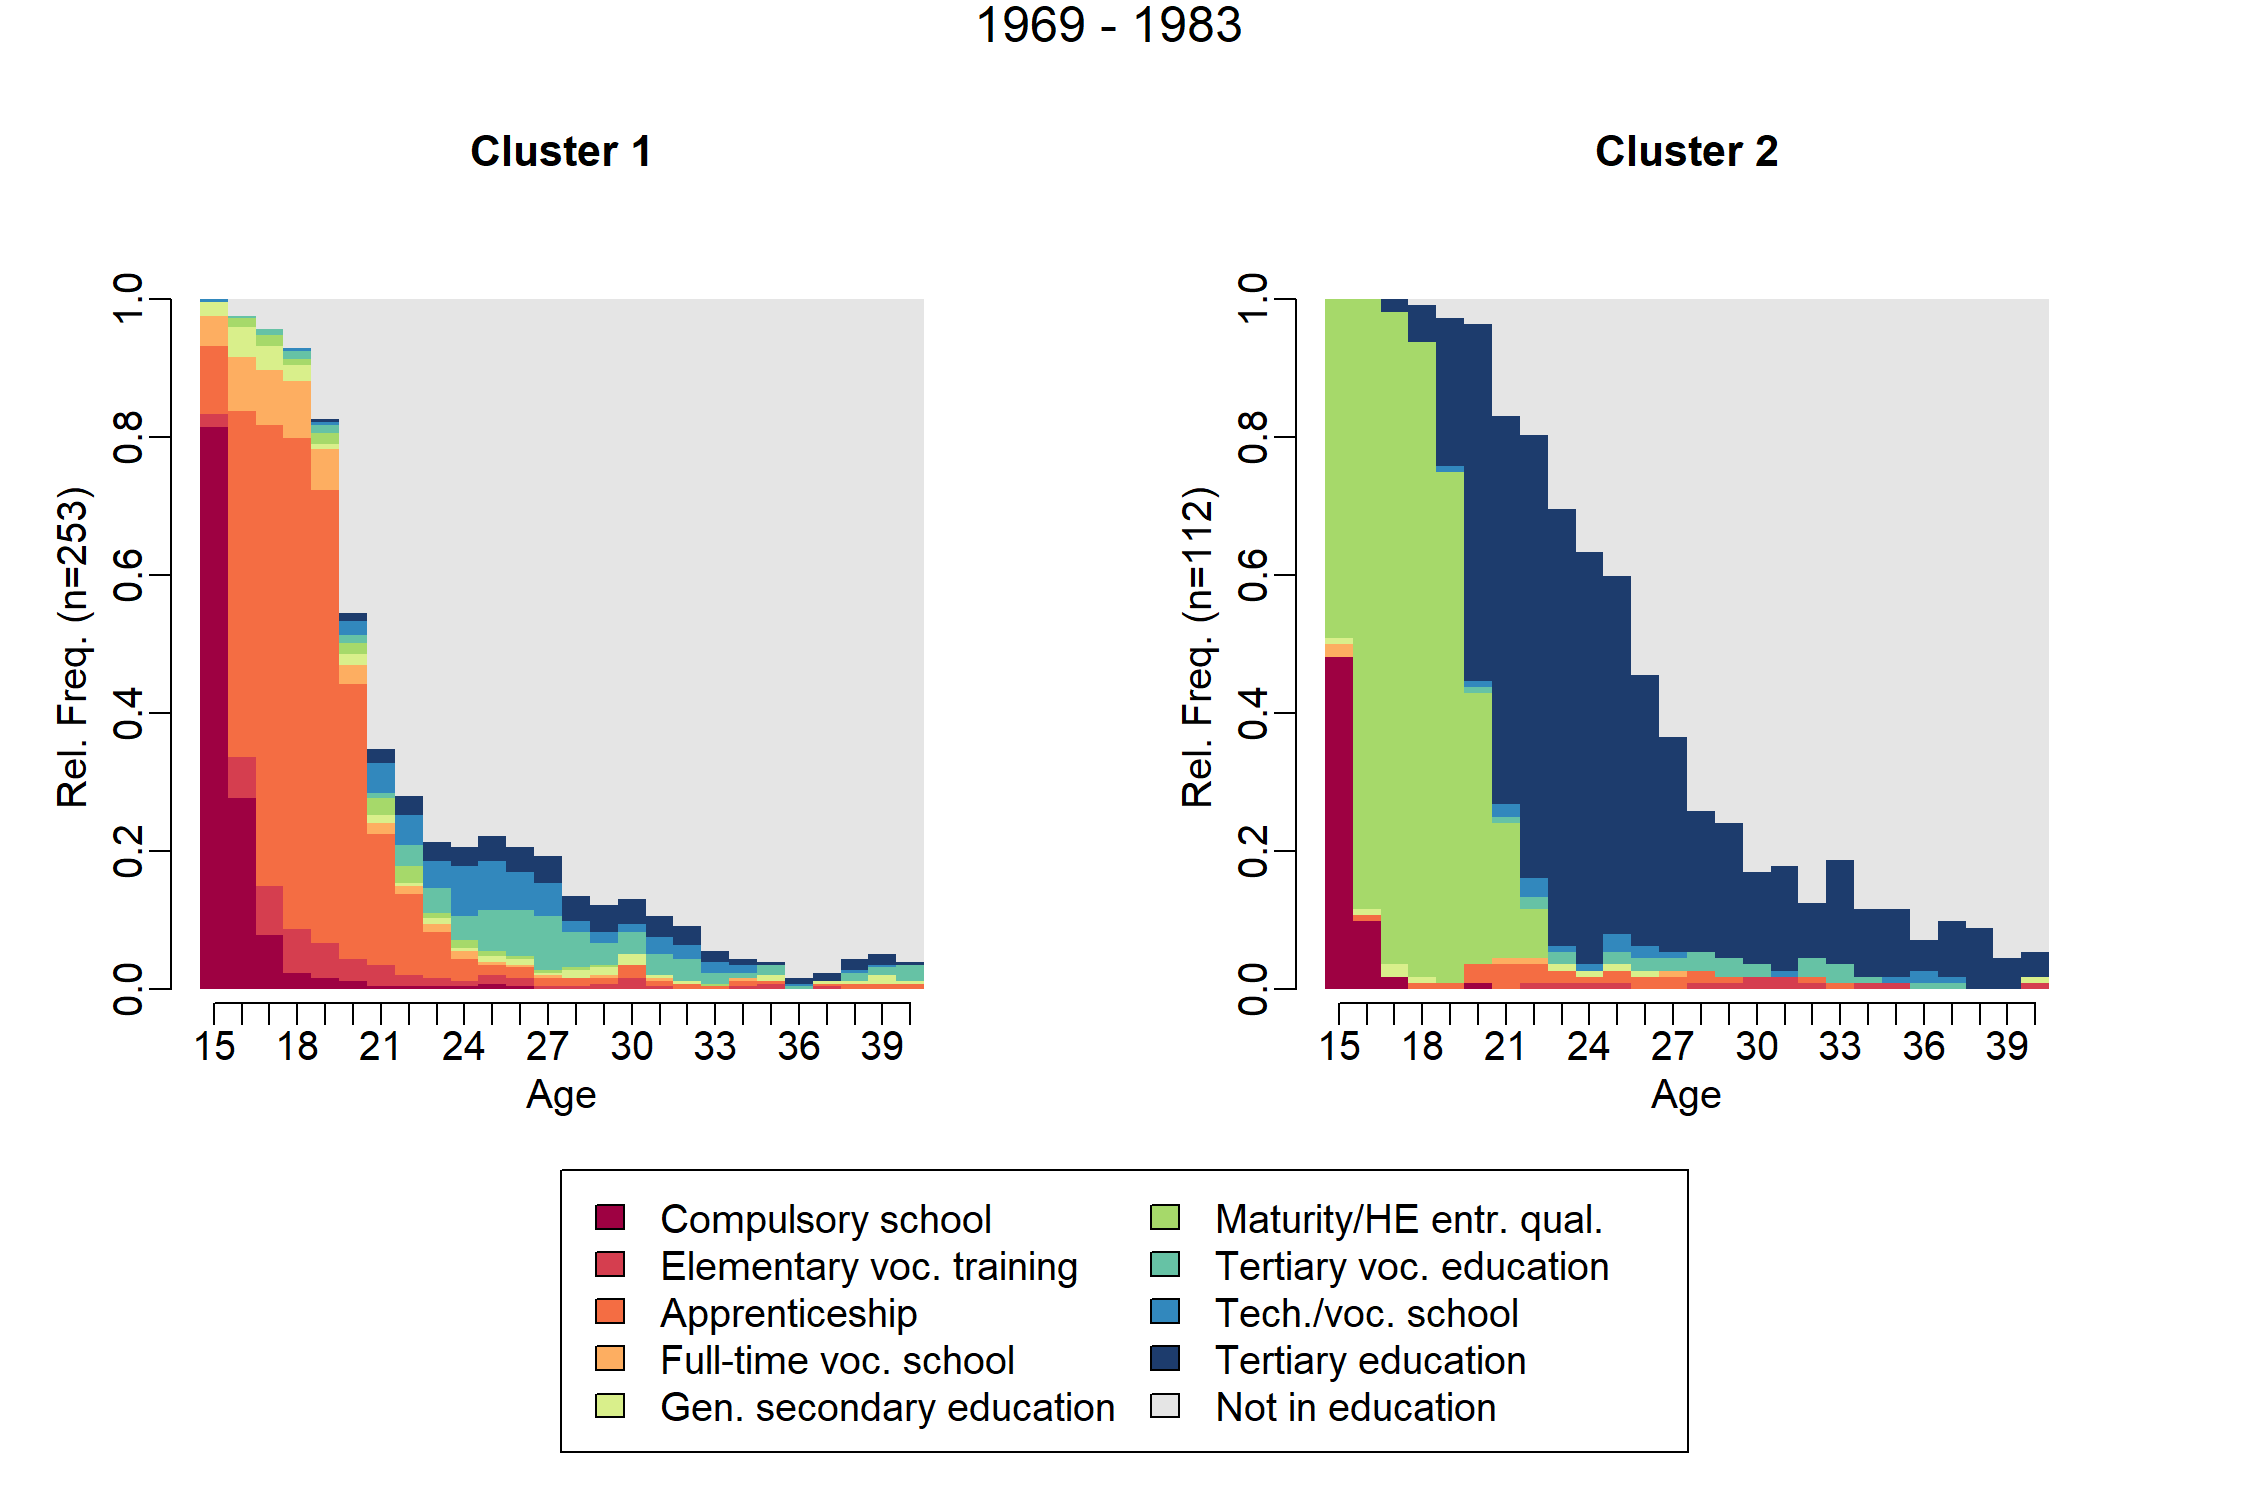 |
| *Source: Swiss Household Panel data, 1999–2023* |

| **Figure A.5: Educational trajectory clusters - state distribution plots across cohort groups**  *4 to 7 Class Solution* |
| --- |
| 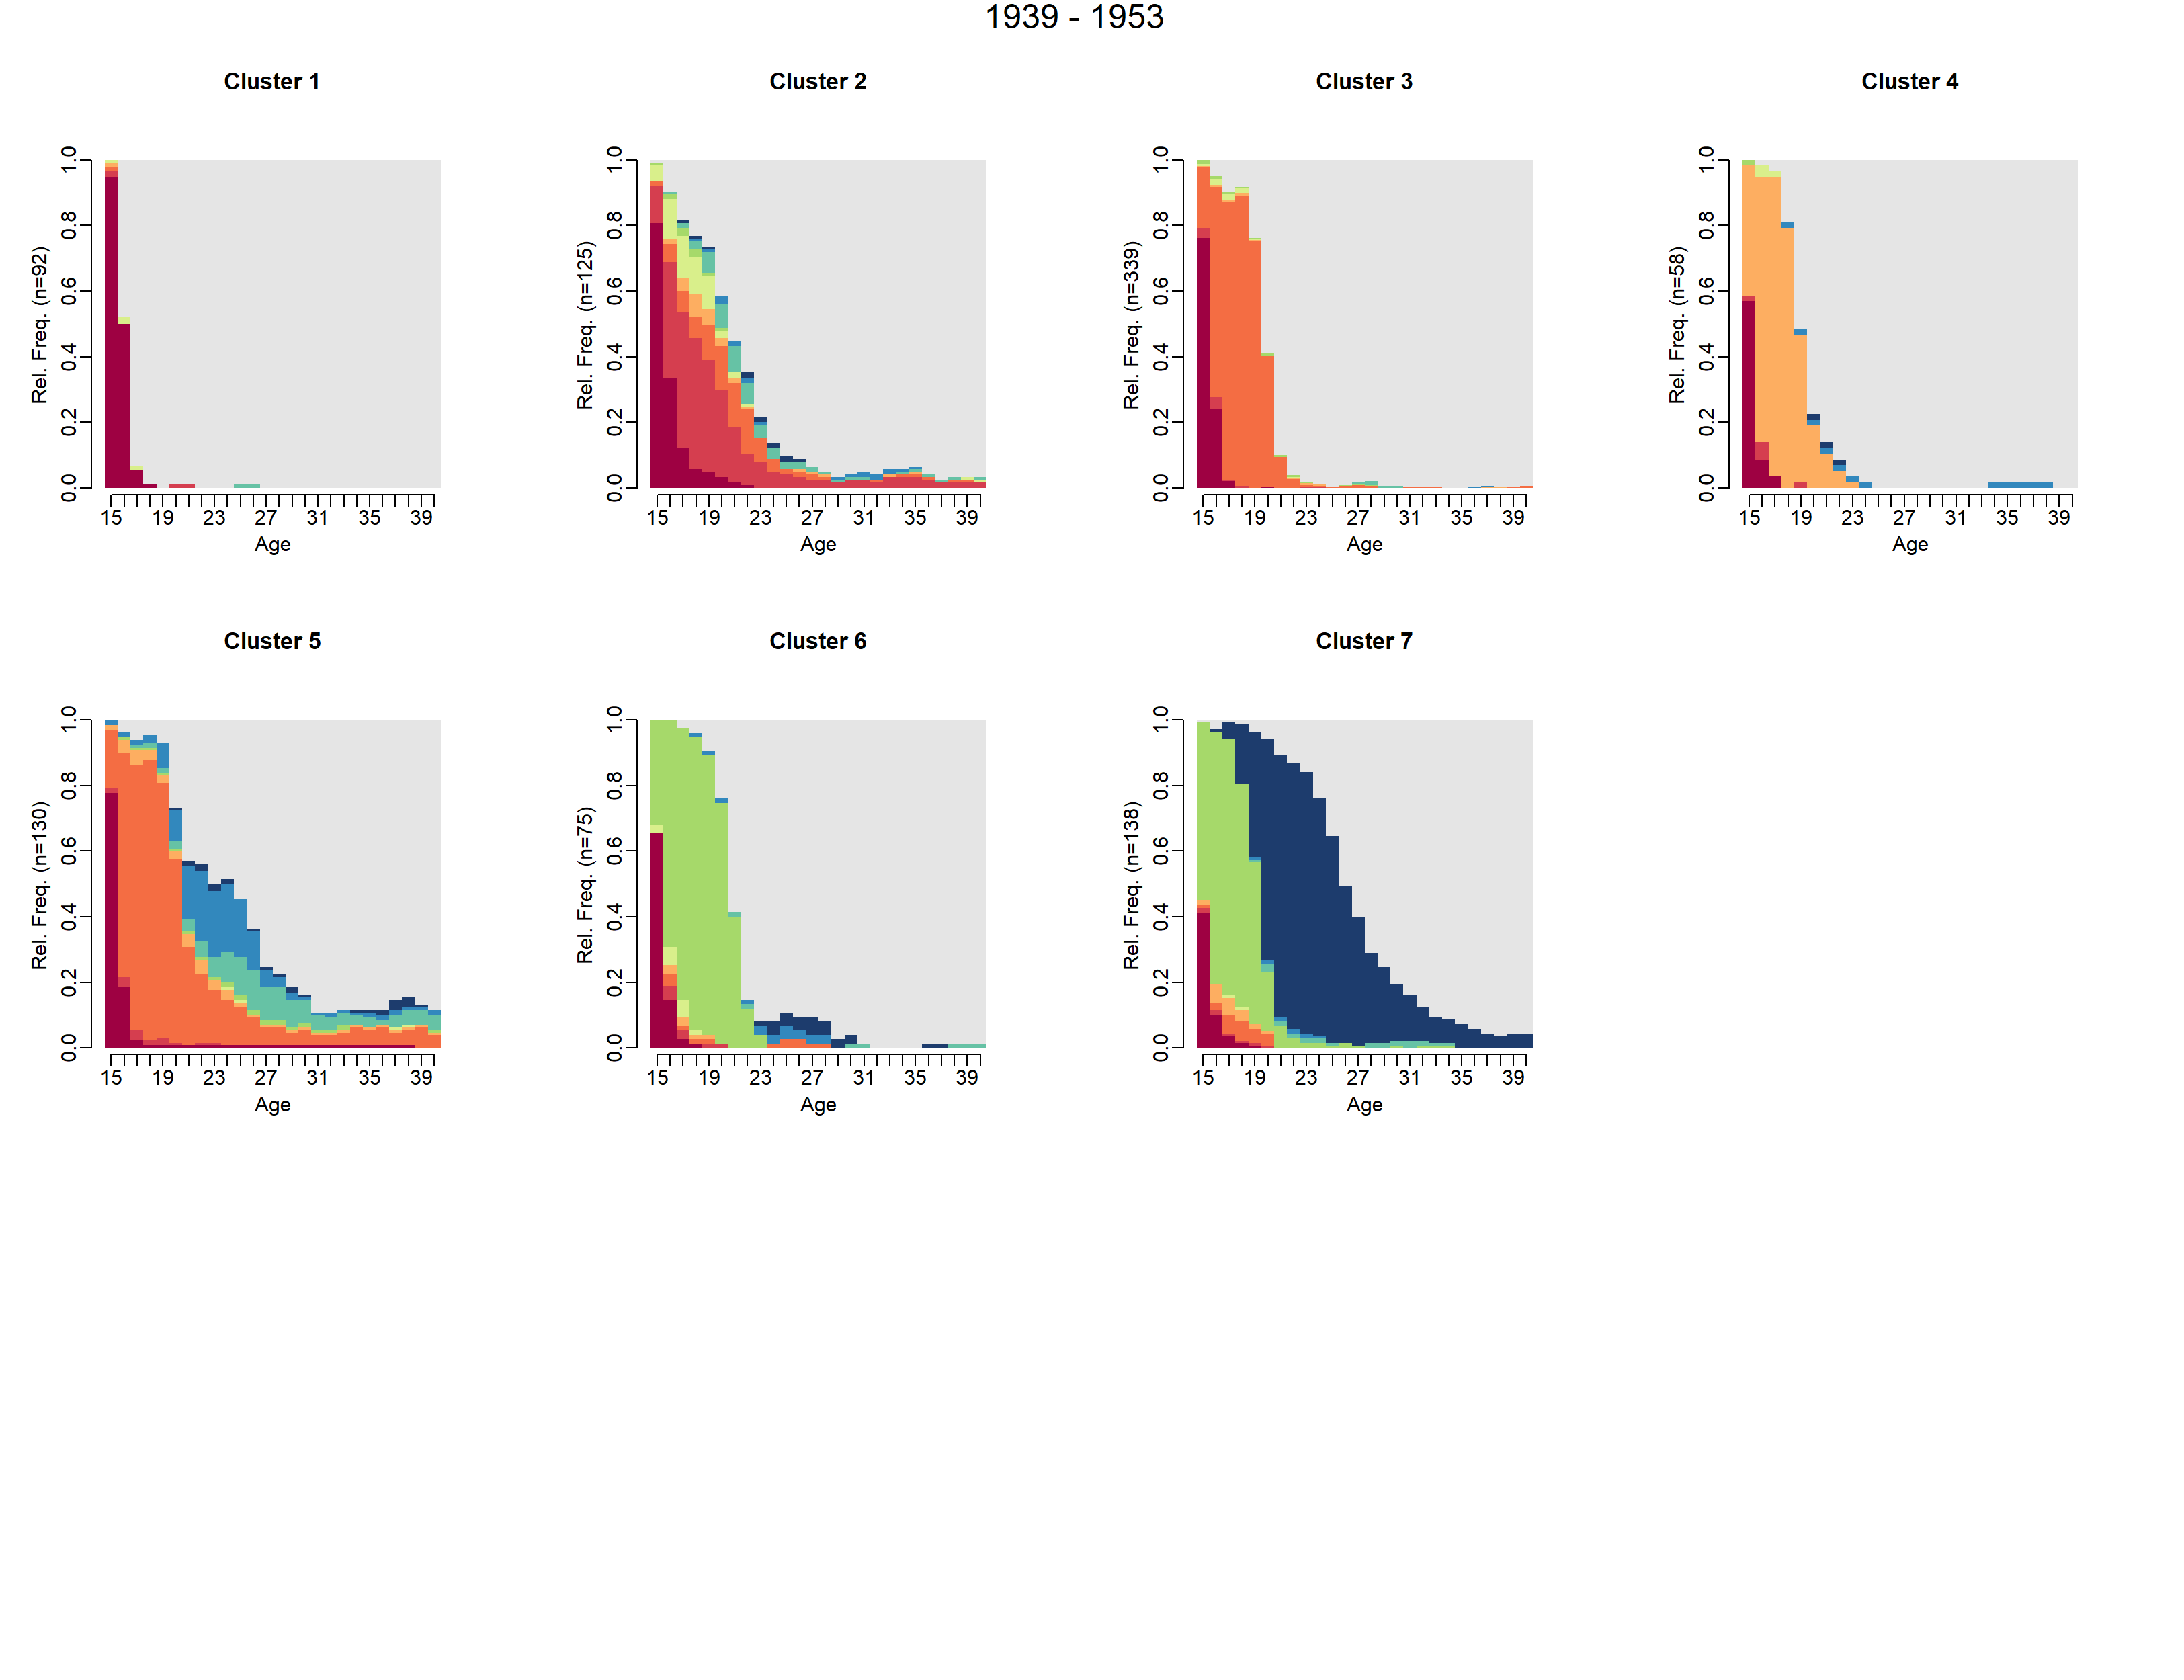 |
| 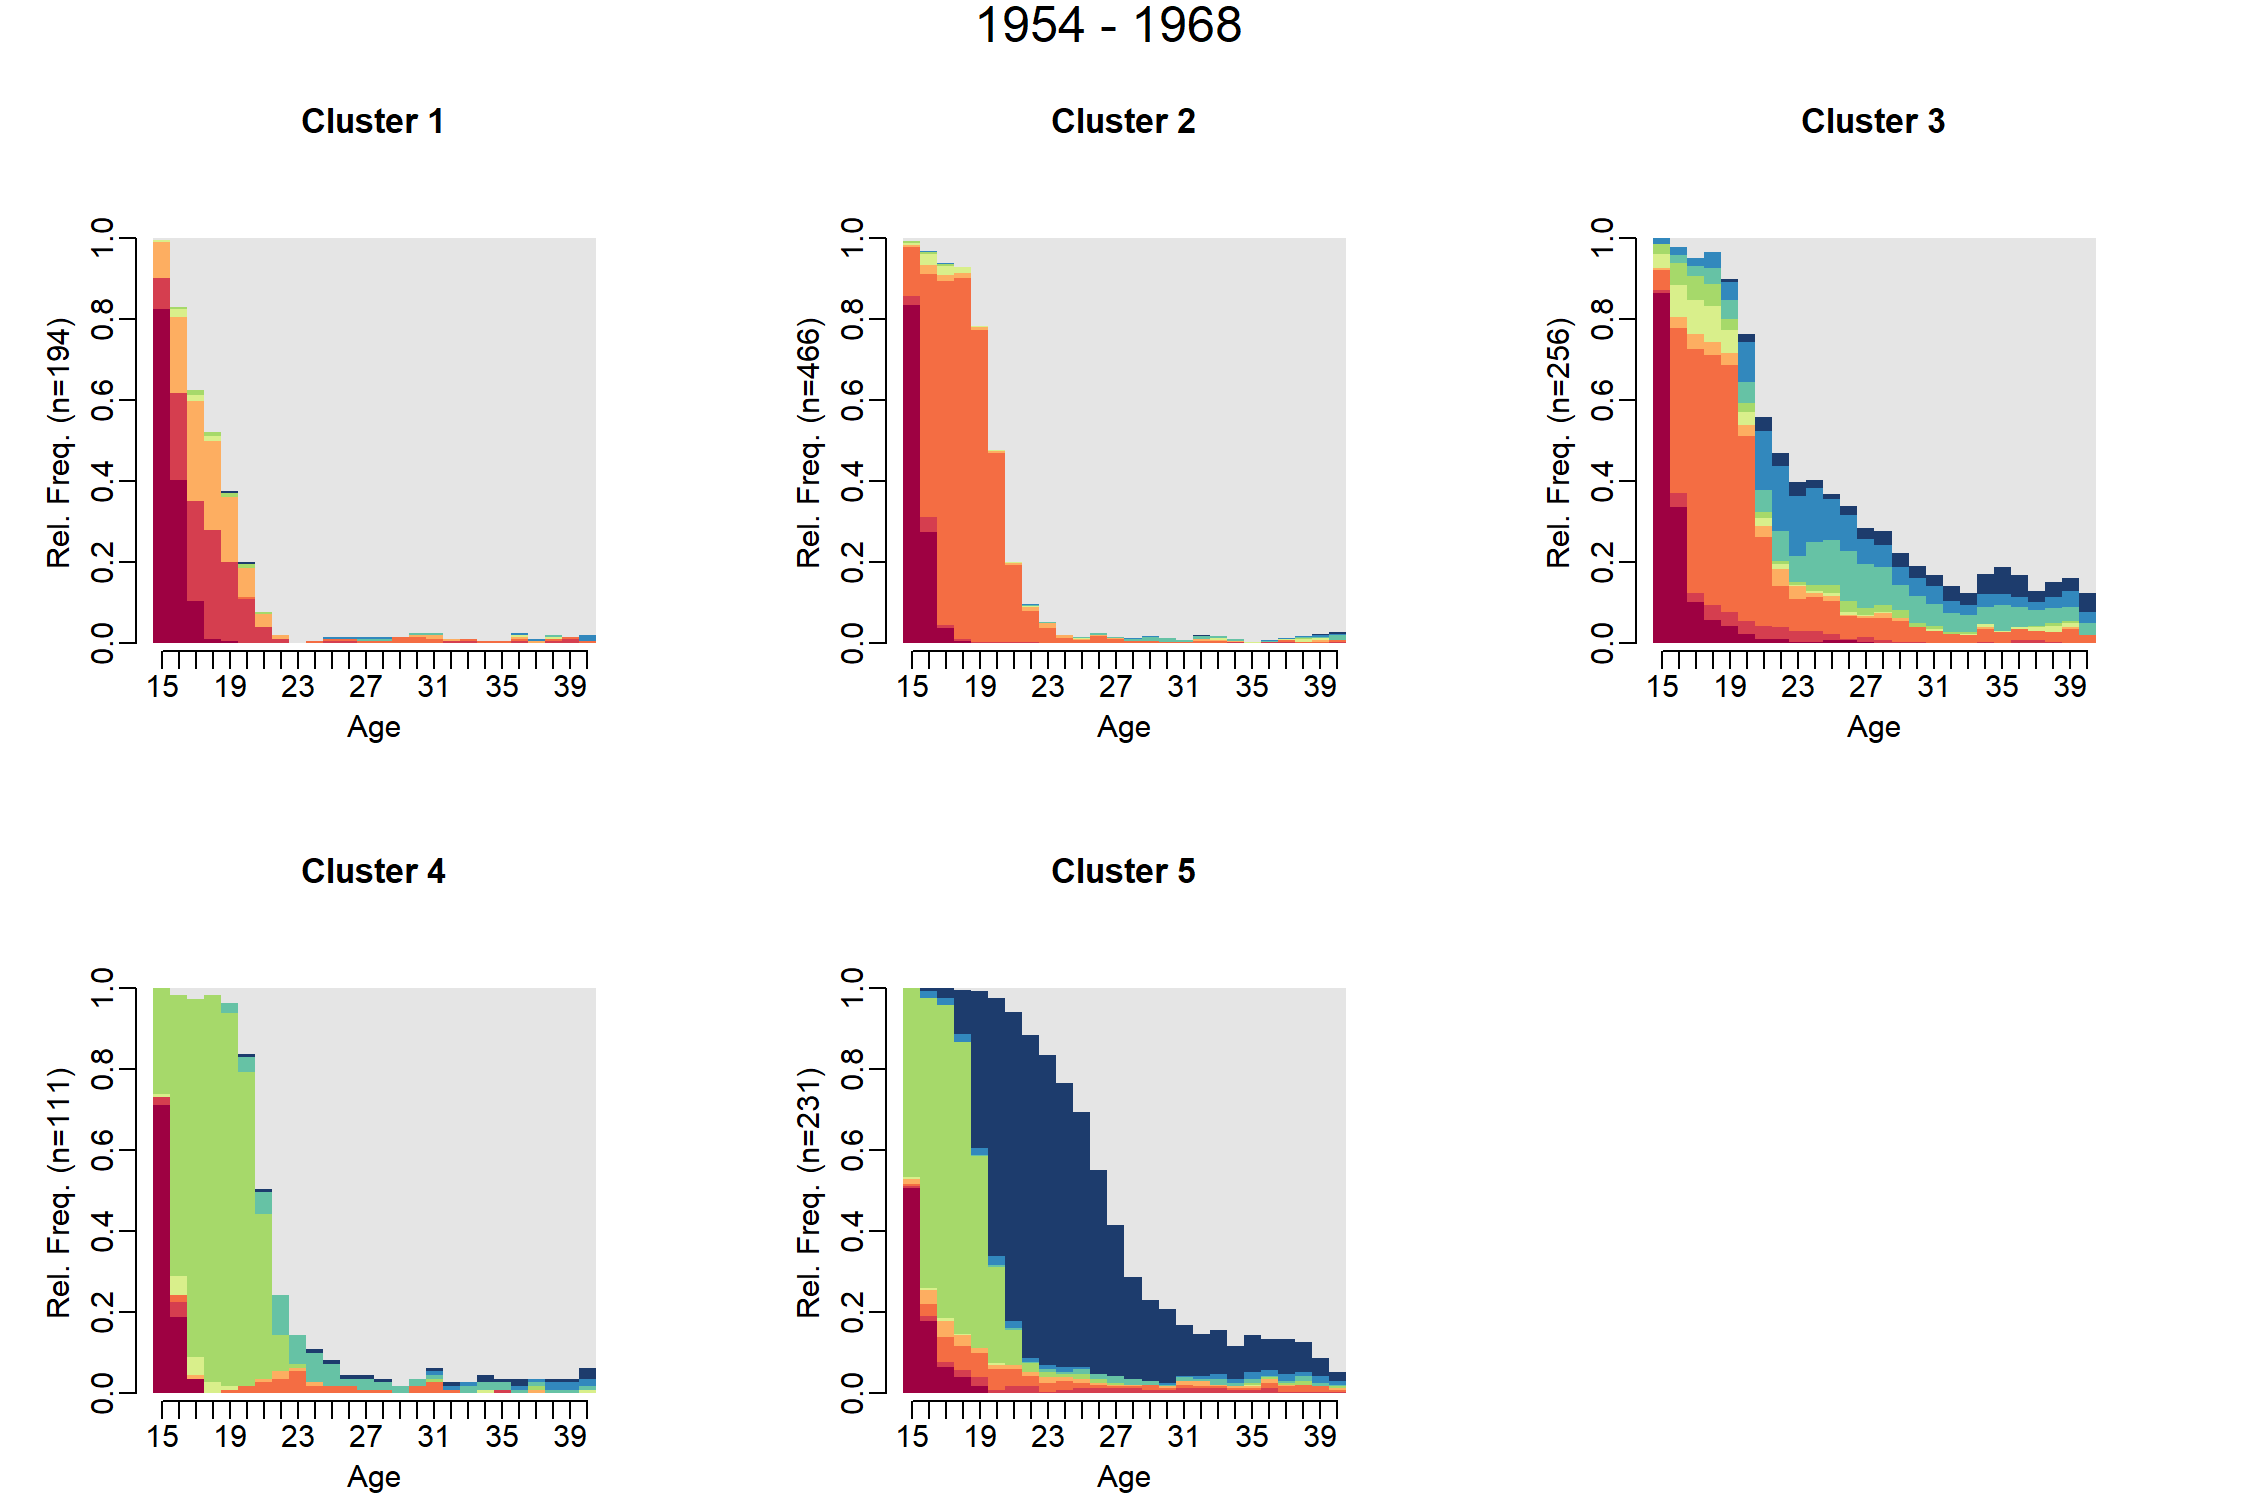 |
| 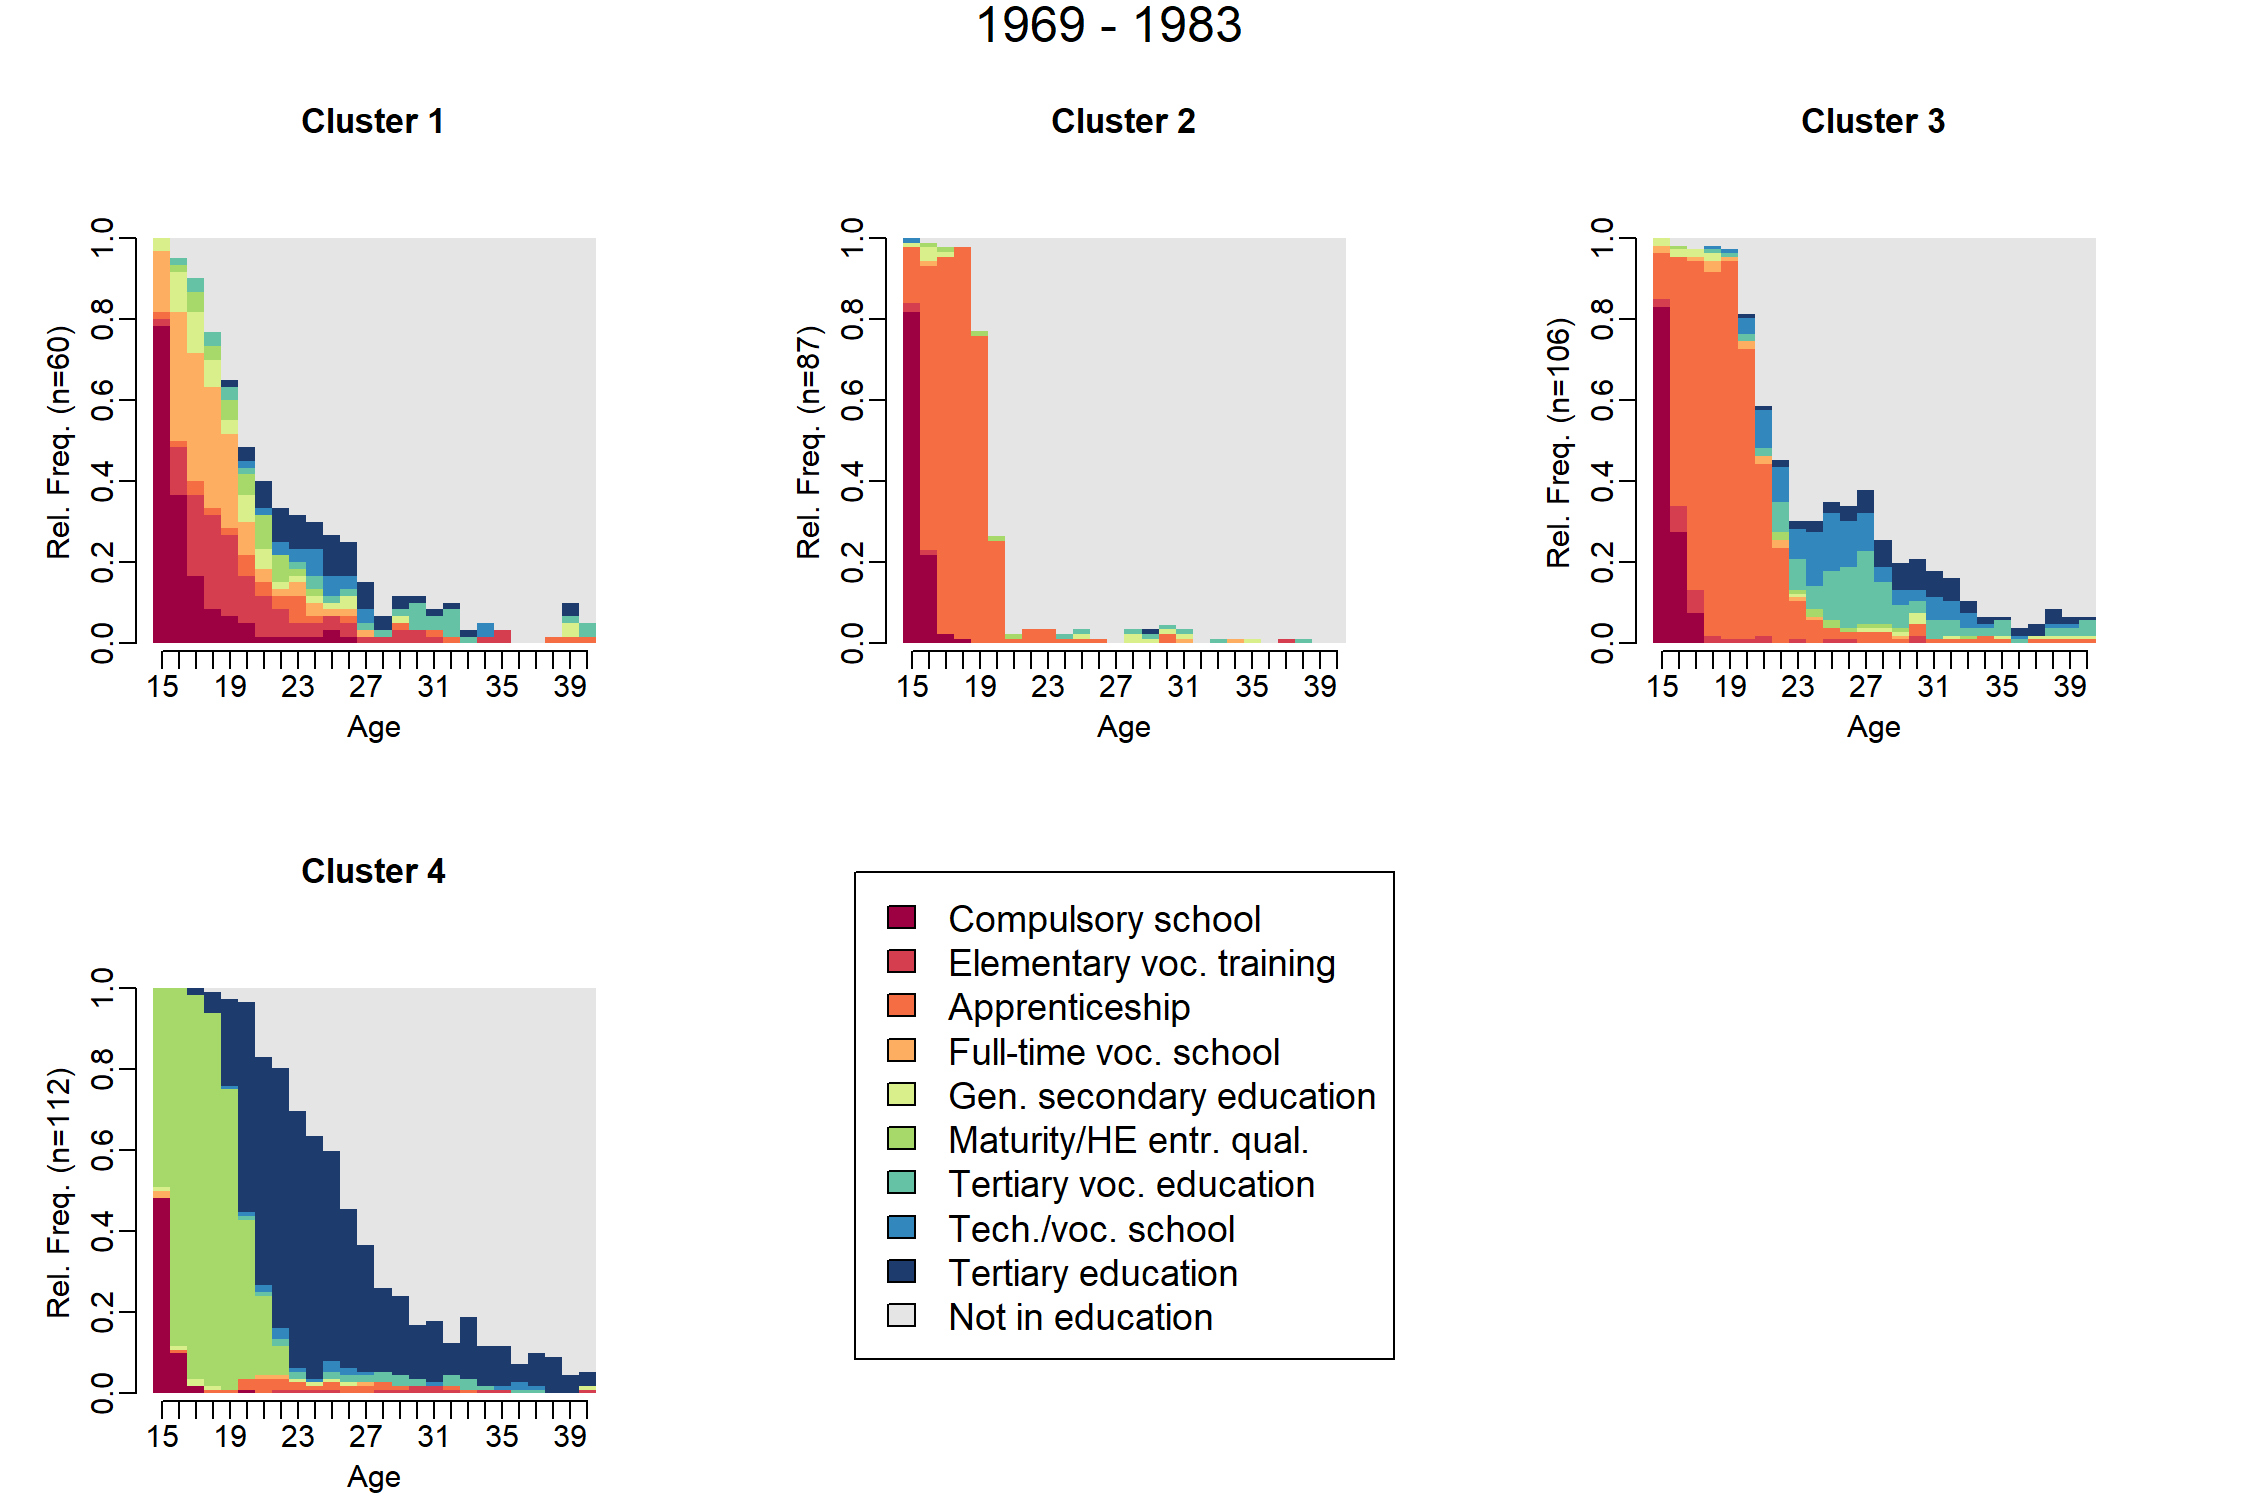  *Source: Swiss Household Panel data, 1999–2023* |

| | **Table A.1: Quality indices for the four best solutions** | | | | | | | | | | | --- | --- | --- | --- | --- | --- | --- | --- | --- | --- | |  |  | N groups | Index | N groups | Index | N groups | Index | N groups | Index | | 1939 - 1953 | PBC | 2 | 0.577 | 8 | 0.448 | 5 | 0.446 | 7 | 0.440 | | HG | 2 | 0.842 | 8 | 0.805 | 7 | 0.777 | 6 | 0.743 | | HGSD | 2 | 0.829 | 8 | 0.788 | 7 | 0.760 | 6 | 0.726 | | ASW | 2 | 0.501 | 3 | 0.310 | 7 | 0.306 | 8 | 0.295 | | ASWw | 2 | 0.502 | 3 | 0.312 | 7 | 0.310 | 8 | 0.300 | | CH | 2 | 234.425 | 3 | 206.169 | 4 | 172.597 | 5 | 157.529 | | R2 | 10 | 0.511 | 9 | 0.496 | 8 | 0.477 | 7 | 0.459 | | CHsq | 2 | 505.698 | 3 | 402.452 | 4 | 325.042 | 5 | 292.795 | | R2sq | 10 | 0.648 | 9 | 0.630 | 8 | 0.623 | 7 | 0.599 | | HC | 8 | 0.089 | 7 | 0.099 | 6 | 0.111 | 5 | 0.119 | |  |  | | | | | | | | | |  |  | N groups | Index | N groups | Index | N groups | Index | N groups | Index | | 1954 - 1968 | PBC | 2 | 0.618 | 6 | 0.503 | 3 | 0.473 | 4 | 0.472 | | HG | 2 | 0.808 | 10 | 0.768 | 6 | 0.768 | 9 | 0.764 | | HGSD | 2 | 0.793 | 6 | 0.752 | 10 | 0.750 | 9 | 0.745 | | ASW | 2 | 0.465 | 6 | 0.284 | 5 | 0.271 | 3 | 0.269 | | ASWw | 2 | 0.466 | 6 | 0.287 | 5 | 0.273 | 3 | 0.271 | | CH | 2 | 309.708 | 3 | 245.236 | 4 | 215.309 | 5 | 196.293 | | R2 | 10 | 0.482 | 9 | 0.466 | 8 | 0.450 | 7 | 0.432 | | CHsq | 2 | 652.838 | 3 | 482.087 | 4 | 387.285 | 5 | 348.754 | | R2sq | 10 | 0.639 | 9 | 0.627 | 8 | 0.606 | 7 | 0.580 | | HC | 6 | 0.106 | 10 | 0.113 | 9 | 0.116 | 2 | 0.120 | |  |  | | | | | | | | | |  |  | N groups | Index | N groups | Index | N groups | Index | N groups | Index | | 1969 - 1983 | PBC | 2 | 0.601 | 8 | 0.464 | 6 | 0.464 | 7 | 0.459 | | HG | 10 | 0.805 | 9 | 0.785 | 2 | 0.756 | 8 | 0.744 | | HGSD | 10 | 0.787 | 9 | 0.768 | 2 | 0.738 | 8 | 0.726 | | ASW | 2 | 0.427 | 3 | 0.248 | 4 | 0.206 | 6 | 0.196 | | ASWw | 2 | 0.431 | 3 | 0.254 | 4 | 0.213 | 10 | 0.208 | | CH | 2 | 119.125 | 3 | 80.207 | 4 | 67.627 | 5 | 61.198 | | R2 | 10 | 0.502 | 9 | 0.489 | 8 | 0.473 | 7 | 0.456 | | CHsq | 2 | 269.578 | 3 | 179.520 | 4 | 141.874 | 5 | 139.167 | | R2sq | 10 | 0.720 | 9 | 0.704 | 8 | 0.689 | 7 | 0.666 | | HC | 10 | 0.102 | 9 | 0.111 | 2 | 0.127 | 8 | 0.131 | |
| --- | --- | --- | --- | --- | --- | --- | --- | --- | --- | --- | --- | --- | --- | --- | --- | --- | --- | --- | --- | --- | --- | --- | --- | --- | --- | --- | --- | --- | --- | --- | --- | --- | --- | --- | --- | --- | --- | --- | --- | --- | --- | --- | --- | --- | --- | --- | --- | --- | --- | --- | --- | --- | --- | --- | --- | --- | --- | --- | --- | --- | --- | --- | --- | --- | --- | --- | --- | --- | --- | --- | --- | --- | --- | --- | --- | --- | --- | --- | --- | --- | --- | --- | --- | --- | --- | --- | --- | --- | --- | --- | --- | --- | --- | --- | --- | --- | --- | --- | --- | --- | --- | --- | --- | --- | --- | --- | --- | --- | --- | --- | --- | --- | --- | --- | --- | --- | --- | --- | --- | --- | --- | --- | --- | --- | --- | --- | --- | --- | --- | --- | --- | --- | --- | --- | --- | --- | --- | --- | --- | --- | --- | --- | --- | --- | --- | --- | --- | --- | --- | --- | --- | --- | --- | --- | --- | --- | --- | --- | --- | --- | --- | --- | --- | --- | --- | --- | --- | --- | --- | --- | --- | --- | --- | --- | --- | --- | --- | --- | --- | --- | --- | --- | --- | --- | --- | --- | --- | --- | --- | --- | --- | --- | --- | --- | --- | --- | --- | --- | --- | --- | --- | --- | --- | --- | --- | --- | --- | --- | --- | --- | --- | --- | --- | --- | --- | --- | --- | --- | --- | --- | --- | --- | --- | --- | --- | --- | --- | --- | --- | --- | --- | --- | --- | --- | --- | --- | --- | --- | --- | --- | --- | --- | --- | --- | --- | --- | --- | --- | --- | --- | --- | --- | --- | --- | --- | --- | --- | --- | --- | --- | --- | --- | --- | --- | --- | --- | --- | --- | --- | --- | --- | --- | --- | --- | --- | --- | --- | --- | --- | --- | --- | --- | --- | --- | --- | --- | --- | --- | --- | --- | --- | --- | --- | --- | --- | --- | --- | --- | --- | --- | --- | --- | --- | --- | --- | --- | --- | --- | --- | --- | --- | --- | --- | --- | --- | --- | --- | --- | --- | --- | --- | --- | --- | --- | --- | --- | --- | --- | --- | --- | --- | --- | --- |
| *Source: Swiss Household Panel data, 1999–2023* |

| **Table A.2: Multinomial logistic regression for the 1939-1953 cohorts across the three clusters by gender, migration background, and social class. Reference cluster: 1.** | | | | | |
| --- | --- | --- | --- | --- | --- |
| *Cohorts 1939-1953* | Cluster 2 | Cluster 3 |  |  |  |
| Constant | 0.112 (0.134) | -2.714*** (0.289) |  |  |  |
| Man | 1.132*** (0.160) | 2.022*** (0.246) |  |  |  |
| Migration background | -0.842*** (0.255) | 0.887*** (0.280) |  |  |  |
| Erikson-Goldthorpe-Portocarero (EGP) class scheme (Ref.: V Working class (skilled and unskilled)) |  |  |  |  |  |
| IV Petite bourgeoisie (self-employed) | -0.343* (0.184) | -0.044 (0.332) |  |  |  |
| III Routine non-manual employees | -0.198 (0.286) | 0.649 (0.435) |  |  |  |
| II Lower service class | -0.196 (0.263) | 1.143*** (0.358) |  |  |  |
| I Upper service class | -0.639** (0.281) | 1.781*** (0.332) |  |  |  |
| *Note: * p < 0.1, ** p < 0.05, *** p < 0.01, standard errors in parentheses, data: Swiss Household Panel data, 1999–2023, McFadden's Pseudo-R² = 0.116* | | | | | |
|  |  |  |  |  |  |
|  |  |  |  |  |  |
| **Table A.3: Multinomial logistic regression for the 1939-1953 cohorts across the six clusters by gender, migration background, and social class. Reference cluster: 1.** | | | | | |
|  |  | | | | |
| *Cohorts 1954-1968* | Cluster 2 | Cluster 3 | Cluster 4 | Cluster 5 | Cluster 6 |
| Constant | 0.783*** (0.150) | -0.639*** (0.193) | -1.184*** (0.250) | -3.557*** (0.461) | -1.570*** (0.243) |
| Man | 0.933*** (0.201) | 1.849*** (0.223) | -0.051 (0.300) | 2.207*** (0.369) | 1.400*** (0.243) |
| Migration background | -1.302*** (0.264) | -0.644** (0.280) | -0.162 (0.329) | 0.740* (0.387) | 0.386 (0.274) |
| Erikson-Goldthorpe-Portocarero (EGP) class scheme (Ref.: V Working class (skilled and unskilled)) |  | | | | |
| IV Petite bourgeoisie (self-employed) | -0.127 (0.219) | -0.041 (0.259) | 0.420 (0.344) | -0.287 (0.629) | -0.108 (0.347) |
| III Routine non-manual employees | -0.190 (0.291) | 0.214 (0.332) | 0.795** (0.403) | 1.923*** (0.504) | 1.242*** (0.353) |
| II Lower service class | -0.001 (0.345) | 0.953*** (0.359) | 1.671*** (0.412) | 1.698*** (0.588) | 1.757*** (0.388) |
| I Upper service class | 0.190 (0.350) | 0.862** (0.379) | 1.696*** (0.421) | 2.668*** (0.532) | 2.654*** (0.374) |
| *Note: * p < 0.1, ** p < 0.05, *** p < 0.01, standard errors in parentheses, data: Swiss Household Panel data, 1999–2023, McFadden's Pseudo-R² = 0.089* | | | | | |
|  |  |  |  |  |  |
|  |  |  |  |  |  |
| **Table A.4: Multinomial logistic regression for the 1939-1953 cohorts across the three clusters by gender, migration background, and social class. Reference cluster: 1.** | | | | | |
| *Cohorts 1969-1983* | Cluster 2 | Cluster 3 |  |  |  |
| Constant | -0.976*** (0.255) | -1.321** (0.290) |  |  |  |
| Man | 1.232*** (0.293) | -0.025 (0.300) |  |  |  |
| Migration background | -0.877 (0.604) | 0.356 (0.469) |  |  |  |
| Erikson-Goldthorpe-Portocarero (EGP) class scheme (Ref.: V Working class (skilled and unskilled)) |  | |  |  |  |
| IV Petite bourgeoisie (self-employed) | -0.430 (0.474) | 0.851* (0.461) |  |  |  |
| III Routine non-manual employees | 0.090 (0.381) | 0.806* (0.418) |  |  |  |
| II Lower service class | 0.669 (0.445) | 1.827*** (0.461) |  |  |  |
| I Upper service class | -0.197 (0.513) | 1.868*** (0.444) |  |  |  |
| *Note: * p < 0.1, ** p < 0.05, *** p < 0.01, standard errors in parentheses, data: Swiss Household Panel data, 1999–2023, McFadden's Pseudo-R² = 0.087* | | | | | |

| **Table A.5: Multinomial logistic regression for the 1939-1953 cohorts across the three clusters by gender, migration background, and parents’ education. Reference cluster: 1.** | | | | | |
| --- | --- | --- | --- | --- | --- |
| *Cohorts 1939-1953* | Cluster 2 | Cluster 3 |  |  |  |
| Constant | -0.321* (0.181) | -3.305*** (0.392) |  |  |  |
| Man | 1.188*** (0.159) | 2.067*** (0.252) |  |  |  |
| Migration background | -0.582** (0.246) | 0.892*** (0.287) |  |  |  |
| Parents education  (Ref.: Compulsory school) |  |  |  |  |  |
| Vocational education and training | 0.374* (0.195) | 0.631 (0.384) |  |  |  |
| General secondary education | 0.227 (0.306) | 2.150*** (0.442) |  |  |  |
| Higher vocational education  (tertiary VET, tech./voc. schools) | 0.233 (0.268) | 1.332*** (0.431) |  |  |  |
| Tertiary education | -1.107** (0.446) | 2.604*** (0.435) |  |  |  |
| *Note: * p < 0.1, ** p < 0.05, *** p < 0.01, standard errors in parentheses, data: Swiss Household Panel data, 1999–2023, McFadden's Pseudo-R² = 0.140* | | | | | |
|  |  |  |  |  |  |
|  |  |  |  |  |  |
| **Table A.6: Multinomial logistic regression for the 1939-1953 cohorts across the six clusters by gender, migration background, and parents’ education. Reference cluster: 1.** | | | | | |
|  |  | | | | |
| *Cohorts 1954-1968* | Cluster 2 | Cluster 3 | Cluster 4 | Cluster 5 | Cluster 6 |
| Constant | -0.531** (0.208) | -1.104*** (0.271) | -1.491*** (0.364) | -3.987*** (0.621) | -2.794*** (0.445) |
| Man | 0.88*** (0.199) | 1.799*** (0.222) | -0.105 (0.295) | 2.055*** (0.369) | 1.349*** (0.245) |
| Migration background | -1.255*** (0.270) | -0.524* (0.286) | -0.085 (0.335) | 0.701* (0.393) | 0.432 (0.290) |
| Parents education  (Ref.: Compulsory school) |  | | | | |
| Vocational education and training | 0.245 (0.224) | 0.551** (0.277) | 0.774** (0.386) | 1.094* (0.601) | 1.679*** (0.448) |
| General secondary education | 0.789* (0.418) | 1.473*** (0.459) | 2.227*** (0.53) | 2.583*** (0.744) | 3.334*** (0.566) |
| Higher vocational education  (tertiary VET, tech./voc. schools) | 0.712* (0.366) | 1.555*** (0.407) | 1.792*** (0.503) | 2.359*** (0.723) | 2.916*** (0.542) |
| Tertiary education | -0.975 (0.675) | 1.763*** (0.537) | 2.366*** (0.596) | 3.765*** (0.754) | 4.571*** (0.605) |
| *Note: * p < 0.1, ** p < 0.05, *** p < 0.01, standard errors in parentheses, data: Swiss Household Panel data, 1999–2023, McFadden's Pseudo-R² = 0.101* | | | | | |
|  |  |  |  |  |  |
|  |  |  |  |  |  |

| **Table A.7: Multinomial logistic regression for the 1939-1953 cohorts across the three clusters by gender, migration background, and parents’ education. Reference cluster: 1.** | | | | | |
| --- | --- | --- | --- | --- | --- |
| *Cohorts 1969-1983* | Cluster 2 | Cluster 3 |  |  |  |
| Constant | -1.654*** (0.500) | -1.367*** (0.482) |  |  |  |
| Man | 1.1494*** (0.286) | 0.000 (0.307) |  |  |  |
| Migration background | -1.282* (0.661) | 0.316 (0.462) |  |  |  |
| Parents education  (Ref.: Compulsory school) |  | |  |  |  |
| Vocational education and training | 0.812 (0.508) | 0.271 (0.509) |  |  |  |
| General secondary education | 0.783 (0.690) | 1.258** (0.641) |  |  |  |
| Higher vocational education  (tertiary VET, tech./voc. schools) | 1.096* (0.636) | 1.500** (0.612) |  |  |  |
| Tertiary education | 0.965 (0.698) | 2.818*** (0.613) |  |  |  |
| *Note: * p < 0.1, ** p < 0.05, *** p < 0.01, standard errors in parentheses, data: Swiss Household Panel data, 1999–2023, McFadden's Pseudo-R² = 0.120* | | | | | |
